# **The human CD8 T stem cell-like memory phenotype appears in the acute phase in Yellow Fever virus vaccination**

**Running title :** CD8 T SCM cells appear in the acute phase

**Silvia A. Fuertes Marraco<sup>1\*</sup>, Amandine Bovay<sup>1</sup>, Sina Nassiri<sup>1,2</sup>, H el ene Maby-El Hajjami<sup>1</sup>, Hajer Ouertatani-Sakouhi<sup>1</sup>, Werner Held<sup>1</sup>, and Daniel E. Speiser<sup>1</sup>**

1 Department of Oncology, Centre Hospitalier Universitaire Vaudois (CHUV) - University of Lausanne, Epalinges, Switzerland

2 Bioinformatics Core facility, The Swiss Institute of Bioinformatics (SIB), Lausanne, Switzerland

**\* Correspondence :**

Silvia. A Fuertes Marraco  
D epartement d'Oncologie CHUV-UNIL  
AA-82, Biop ole 3, Centre de Laboratoires d'Epalinges  
Chemin des Boveresses 155, CH-1066 Epalinges  
silvia.fuertes@chuv.ch  
Tel. + 41 21 692 5955

**Maintext word count :** 6277 words

**Abstract word count :** 245 words

**Number of figures :** 7 main, 7 supplementary, 2 videos

**Number of tables :** 3 supplementary

**Number of references :** 48

## 1 **Abstract**

2

3

4

5

6

7

8

9

10

11

12

13

14

15

16

17

18

19

20

21

22

23

24

25

Long-term memory is a fundamental feature of cytotoxic CD8 T cell immunity. Yet when do memory cells arise, especially in humans, is poorly documented, the pathways of effector / memory cell differentiation being largely debated. Based on a cross-sectional study, we previously reported that the live-attenuated Yellow Fever virus vaccine YF-17D induces a stem cell-like memory (SCM) CD8 T cell population persisting for at least 25 years. Here we present longitudinal data revealing that an activated SCM phenotype is distinctly detectable early on following YF-17D vaccination, i.e. at the same time as activated effector cells. In the long-run, the cells that express the transcription factor T cell factor 1 (TCF1) preferentially persist, consistent with the role of TCF1 in memory establishment. By performing t-distributed Stochastic Neighbour Embedding of flow cytometry data on standard differentiation and activation markers, we obtained a time-lapse representation of the dynamics of the CD8 T cell response: SCM cells appear early and remain closely related to the baseline Naive cells, while effector cells burst out of baseline and gradually contract after the peak of the response. Altogether, we observe heterogeneity in differentiation phenotypes in both the acute phase and the decade-long-term phases, including cells with memory phenotypes very early in the response. As opposed to models where memory cells develop from effector cells, our data support differentiation models where long-term memory cells are established by the early decision to retain proximity to the Naive state in a memory-dedicated pool of cells.

**Keywords:** Stem cell-like memory, CD8 T cell, Yellow Fever virus YF-17D vaccination, acute phase, T cell factor 1.

## 26 **Introduction**

27

28       The capacity to remember a pathogen and effectively protect the organism against it long-  
29 term is a fundamental property of the adaptive immune response. This is also relevant for  
30 tumour immunology since it is now well established that strong and long-lasting cytotoxic CD8  
31 T cell responses correlate with better prognosis for cancer patients (Fridman et al., 2012), and  
32 that innovative immunotherapies can defeat various types of metastatic cancers with  
33 unprecedented long-term success (Ribas and Wolchok, 2018).

34

35       Once the naïve T cells are primed upon antigenic encounter, the various functionalities of  
36 CD8 T cells are ensured by a heterogeneity of cells, with varying degrees of memory and  
37 effector functions. Initially classified into only two functional types (effector or memory), the  
38 heterogeneity of CD8 T cells has been more comprehensively defined over the last decade. The  
39 venue of transcriptomic and epigenetic profiling complementing functional assays has revealed  
40 a continuum of phenotypes with varying longevity, self-renewal, proliferative potential,  
41 expression of homing, costimulatory and transcription factors, and functions including cytokine  
42 secretion and cytotoxicity (Crompton et al., 2015; Farber et al., 2013; Gattinoni et al., 2012;  
43 Gray et al., 2014; Roychoudhuri et al., 2015). Globally, effector cells display cytotoxicity and  
44 readily produce cytokines, while memory cells resemble more the Naïve cells based on their  
45 high proliferative capacity and potential to generate effector progeny, together with long-term  
46 persistence and self-renewal (so called stemness). Traditionally, surface markers (including  
47 distinct homing molecules) and transcription factors have been used to define the various CD8  
48 T cell subsets. In humans, classic subsets are primarily identified on the basis of surface C-C  
49 motif chemokine receptor 7 (CCR7) and CD45RA expression, with Naïve being CCR7+  
50 CD45RA+, the central memory (CM) being CCR7+ CD45RA-, and the CCR7- effector  
51 memory subsets split into CD45RA- effector memory (EM) and effector memory CD45RA+  
52 (EMRA) cells (Sallusto et al., 2004). More recently, the stem cell-like memory (SCM) subset  
53 was revealed among CCR7+ CD45RA+ cells (within the classic Naïve gate) on the basis of  
54 positive expression of markers such as CD58, CXCR3, IL2Rb and the more prominently used  
55 CD95 marker (Gattinoni et al., 2011; Lugli et al., 2012).

56

57       Along with the increasingly comprehensive characterization of the heterogeneity of CD8 T  
58 cell phenotypes and functions, several models have emerged to describe the differentiation  
59 pathways of antigen-experienced CD8 T cells, addressing the genealogy of memory and  
60 effector cells. The initially proposed model of CD8 T cell differentiation is linear: it suggests a

61 sequential differentiation of naïve cells, first into effectors that predominate in the acute phase,  
62 followed by differentiation of a fraction of effector cells into memory cells, as the response  
63 contracts and the remaining effector cells die out or become terminally senescent. In the mouse  
64 system, the linear model evolved to describe early effector cells (EEC) that give rise to two  
65 types of effector cells: one Short-lived effector cell (SLEC) and another Memory precursor  
66 effector cell (MPEC) – long-term memory thus predominantly originates from MPECs (Crauste  
67 et al., 2017; Lefrançois and Obar, 2010; Yuzefpolskiy et al., 2014). Alternative models have  
68 proposed that memory cells diverge from effector cell differentiation, without an obligatory  
69 acute effector stage. For instance, the so-called bifurcative model proposes an immediate  
70 divergence from the naïve cell: in a first asymmetric cell division, the antigen-primed naïve cell  
71 splits into distinct daughter cells, each with a distinct memory or effector fate (Ahmed et al.,  
72 2009; Moulton and Farber, 2006). More recently, the proposed models integrate the large and  
73 gradual heterogeneity of memory and effector cells, based on the observed continuum of whole  
74 transcriptome and epigenetic profiles (Crompton et al., 2015; Henning et al., 2018; Restifo and  
75 Gattinoni, 2013). These suggest that CD8 T cells may undergo progressive differentiation, from  
76 the naïve, to the SCM, CM, EM and EMRA cell stages, and all the various subsets may give  
77 rise to effector progeny or show effector function in their activated state (Farber et al., 2013;  
78 Mahnke et al., 2013).

79

80 To date, it is still controversial whether memory results from an early decision to diverge  
81 from effector fate or whether a fraction of effectors gives rise to memory cells. Recent studies  
82 continue debating whether long-lived memory cells display an epigenetic imprint that would  
83 correspond to an effector phenotype past (Akondy et al., 2017; Ben Youngblood et al., 2017) or  
84 whether stemness (highest memory potential) is preserved epigenetically in antigen-primed  
85 naïve cells that become memory cells and it is the silencing of memory / stemness genes that  
86 drives effector differentiation (Pace et al., 2018). One limitation is that nascent memory cells  
87 are not easily detectable or may not be distinguished from effector cells in the activated, acute  
88 phase (Opata and Stephens, 2013). Markers such as IL7Ra have been highlighted to identify the  
89 precursors of long-lived memory cells (the MPECs in mice), distinct from the majority of  
90 activated cells that die after the acute phase (Kaech and Cui, 2012). One major factor that is  
91 essential to sustain memory formation is the transcription factor T cell factor 1 (TCF1, encoded  
92 by the *TCF7/Tcf7* gene) (Jeannet et al., 2010; Utschneider et al., 2016; Zhao et al., 2010; Zhou  
93 et al., 2010). TCF1 is expressed at high levels in Naïve and memory but not in effector cells  
94 (Kratchmarov et al., 2018; Roychoudhuri et al., 2015; Willinger et al., 2006), and is  
95 epigenetically regulated during CD8 T cell differentiation (Abdelsamed et al., 2017; Crompton



96 et al., 2015) as one major gene involved in effector differentiation arrest and maintenance of  
97 stemness (Gattinoni et al., 2009; Pace et al., 2018; Wu et al., 2016). Recently, we showed that  
98 inflammatory cytokines suppress TCF1 and facilitate effector differentiation (Danilo et al.,  
99 2018).

100•

101 Overall, studies on the identification of precursors and discernment of early fate decisions  
102 rely on genetic manipulation and the adoptive transfer or deletion of cells to test their progeny  
103 potential, which is limited to mouse models. Yet a major level of complexity in the study of  
104 CD8 T cell differentiation is the idiosyncrasies in mouse *versus* human systems. While  
105 fundamental phenomena may be shared, in practice, there are basic differences in the markers  
106 used to classify CD8 T cell subsets. Therefore, and in complement to the ontological questions  
107 that can readily be addressed in the mouse experimental system, the evidence that originates  
108 from the study of human CD8 T cells is uniquely valuable. One human model that has been  
109 particularly informative to fully apprehend optimal immunogenicity in humans, including the  
110 study of CD8 T cell differentiation, is the acute response to the live-attenuated Yellow Fever  
111 virus vaccine YF-17D (Miller et al., 2008; Pulendran et al., 2013). We previously found that  
112 YF-17D vaccination induces a population of SCM cells and showed that these memory cells  
113 last for decades representing the most stably persisting T cell population ever described  
114 (Fuertes Marraco et al., 2015; Marraco et al., 2015). However, the earliest time-point after  
115 vaccination that we studied was 3.6 months, well after the acute phase of the response. There is  
116 currently no information on when SCM cells appear during an immune response in humans.  
117 Here, we aimed to study the distribution and dynamics of human CD8 T cell subsets during the  
118 first few days to months after YF-17D vaccination based on a longitudinal clinical study  
119 protocol (i.e. including the acute phase of the response), combined with analysis in the decade-  
120 long-term based on our previous cross-sectional study cohort.

## 121 **Materials and Methods**

122

### 123 **Study design, population and ethics statement**

124 Samples used in this study originated from peripheral blood of healthy volunteers aged 18 to 65  
125 years that participated in one of two study protocols on YF-17D vaccination (Stamaril, Sanofi  
126 Pasteur). Donors from the first cohort “YF1” (study protocol 329/12) had a history of YF-17D  
127 vaccination ranging from 3.6 months to 23.74 years (cross-sectional) and donated blood in the  
128 local Blood Transfusion Center (Service régional vaudois de transfusion sanguine, 1066  
129 Epalinges), as we described previously ((Fuertes Marraco et al., 2015). Donors from the second  
130 cohort “YF2” (study protocol 324/13) were in the prospect of receiving the YF-17D vaccine in  
131 view of travelling to endemic areas and participated to longitudinal sampling before and several  
132 time-points after YF-17D vaccination, in collaboration with the local vaccine center Centre de  
133 vaccination et de médecine des voyages (Policlinique Médicale Universitaire (PMU),  
134 Lausanne). The full metadata details of the two cohorts are listed in Table S1. The study  
135 protocols were approved by the Swiss Ethics Committee on research involving humans of the  
136 Canton of Vaud (CH). All participants provided written informed consent.

137

### 138 **Peripheral blood collection and processing**

139 Peripheral blood samples were collected and immediately processed for cryopreservation  
140 awaiting experimental use. Peripheral blood mononuclear cells (PBMC) were obtained from  
141 anti-coagulated whole blood diluted 1:1 in phosphate buffered saline (PBS) and overlaid on  
142 Lymphoprep for density gradient fractionation (30 min at 400g without break) and were  
143 cryopreserved in complete RPMI 1640 supplemented with 40% fetal calf serum (FCS) and  
144 10% dimethyl sulfoxide. Plasma samples were obtained from the supernatant of EDTA-coated  
145 blood tubes after centrifugation at 1'000g for 15 min at RT followed by a second centrifugation  
146 at 8'000g for 10 min at 4°C.

147

### 148 **Assay to determine copy numbers of the Yellow Fever virus YF-17D**

149 Yellow Fever virus (YFV) load was quantified using 1ml of plasma from EDTA-anticoagulated  
150 blood based on a Taqman Real-time PCR assay to detect YFV genome copies as previously  
151 described (Akondy et al., 2015).

152

### 153 **Flow cytometry staining, acquisition and analysis**

154 On the day of the experiment, frozen vials of PBMC were thawed in RMPI containing 10 µg /  
155 ml of DNase I (Sigma) and resuspended in fluorescence-activated cell sorting buffer (FACS

156 buffer: PBS with 5mM EDTA, 0.2% Bovine Serum Albumin and 0.2% sodium azide). Thawed  
157 PBMC were subjected to CD8<sup>+</sup> T cell selection using the negative enrichment kit from Stem  
158 Cell. CD8 T cell-enriched samples were then stained for flow cytometry according to target  
159 panels and cytometers as summarized in Table S2 and with reagents as listed in Table S3.  
160 Stainings were made in sequence depending on the target, as follows: 1) first, cells were stained  
161 with multimers for 30 min at 4°C in FACS buffer and washed in FACS buffer, 2) surface  
162 antibodies were added in FACS buffer and washed with PBS prior to 3) staining with fixable  
163 viability dye in PBS and washed with PBS, 4) cells were then fixed overnight at 4°C and  
164 washed in permeabilization buffer before 5) intracellular staining in permeabilization buffer at  
165 4°C (the primary rabbit anti-TCF1 and the secondary fluorochrome-conjugated anti-rabbit IgG  
166 were stained in two subsequent steps). The fixation and permeabilization buffers were from the  
167 Foxp3 staining kit from eBioscience. Washes were made by centrifugation at 450g for 7 min.  
168 Samples were resuspended in FACS buffer for acquisition. For samples in the YF2 study, the  
169 baseline sample vial originally contained 1.5 x 10<sup>7</sup> frozen PBMC and the remainder of time-  
170 points' vials contained 10<sup>7</sup> frozen PBMC – the complete volume of stained samples was  
171 finally acquired. Cytometers were the Gallios (Beckman Coulter, 3 laser, 10-color) and the  
172 LSR II Special Order Research Product (Beckton Dickinson, 5 laser including UV, 13- or 14-  
173 color). Before each acquisition, the cytometer setup and tracking (CST) was ran in order to  
174 normalize channel voltages across experiments using the same instrument configuration and  
175 experimental layout. Flow cytometry FCS data files were analyzed in FlowJo 9.7.7, except for  
176 the analyses using t-distributed Stochastic Neighbor Embedding (tSNE) for which the  
177 corresponding plugin in FlowJo 10.4.2 was used. Downsampling, concatenation or exports of  
178 specific populations and samples were performed as indicated in the figure legends also in  
179 FlowJo 10.4.2. For the longitudinal tSNE analyses of A2/LLW-specific CD8 T cells, all single  
180 live A2/LLW-specific CD8 T cell events of the longitudinal series were concatenated and thus  
181 are represented in proportions corresponding to the original numbers of PBMC thawed, which  
182 are equal across time-points (corresponding to 10<sup>7</sup> PBMC thawed) except for the baseline  
183 which is 1.5-fold larger (1.5 x 10<sup>7</sup> PBMC thawed). The detection threshold for multimer  
184 positive populations was 0.01% of total CD8 T cells and at least 10 events (horizontal dotted  
185 line in Figure 1C and D), based on control stainings using HLA-A\*02 negative samples stained  
186 with tetramer and unstained controls. The positivity threshold for each marker was set  
187 according to distinct negative and positive populations in bulk CD8 T in resting and/or  
188 activated samples; for the indirect TCF1 staining, the negative signal was further validated with  
189 secondary antibody-only controls.

190

191 **Quantifications and statistical analyses**

192 Flow cytometry data analyzed with FlowJo was quantified based on tabulated exports of the  
193 frequencies and events in the gates of interest. Calculations and data display thereafter was  
194 performed using the softwares Microsoft Excel 15.21.1, GraphPad prism 7.0c and SPICE v5.35  
195 (for co-expression analyses). Statistical values were obtained as detailed in each figure legend  
196 (on the basis of normality tests), where trend =  $p > 0.05$  and  $< 0.10$ , \* =  $p < 0.05$ , \*\* =  $p < 0.01$ , \*\*\*  
197 =  $p < 0.001$  and ns = not significant. For the SPICE analyses, p-values originate from the built-in  
198 t-test in SPICE using 10'000 permutations. Longitudinal modeling of the flow cytometry data  
199 was achieved using linear mixed effects splines. In brief, linear splines with 3 internal knots  
200 and a random intercept was fit using the lme4 package in R (Bates et al., 2015). Pairwise  
201 comparison of fits to individual subsets was performed by fitting a null model to pooled data  
202 from the two subsets, a full model with distinct fits capturing the trends in each subset, and  
203 using the likelihood ratio test to assess the difference between these two nested models using  
204 the Chi square distribution. Resulting p-values were further adjusted for multiple comparisons  
205 using the Bonferroni method.

## 206 **Results**

207

### 208 **CD8 T cells with a CCR7+ memory phenotype expand in the acute phase of YF-17D** 209 **vaccination**

210

211 In order to study the early dynamics of CD8 T cell differentiation, we recruited healthy  
212 volunteers that were going to receive the YF-17D vaccine in order to obtain peripheral blood  
213 samples before and at several time-points after vaccination (including early days and up to 6  
214 months after vaccination). The study schedule and cohort are detailed in Table S1A :  
215 “Longitudinal cohort : YF2 study”. Using peptide-MHC multimers, we detected CD8 T cells  
216 specific for the immunodominant HLA-A\*02-restricted epitope of the Non-Structural 4b  
217 protein of Yellow Fever virus (the LLWNGPMAV epitope (Akondy et al., 2009; Blom et al.,  
218 2013; de Melo et al., 2013)), hereafter referred to as “A2/LLW”) in eight HLA-A\*02+  
219 vaccinees. The phenotypes of CD8 T cell differentiation were determined based on the classic  
220 markers CCR7 and CD45RA (Sallusto et al., 2004) as shown in Figure 1A to detect Central  
221 Memory (CM: CCR7+ CD45RA-), Effector Memory (EM: CCR7- CD45RA-) and Effector  
222 Memory CD45RA+ (EMRA: CCR7- CD45RA+); within the CCR7 CD45RA double-positive  
223 gate, Naïve and Stem Cell-like Memory (SCM) subsets were discriminated based on CD95  
224 expression (Gattinoni et al., 2011; Lugli et al., 2012; Mahnke et al., 2013). Of note, the  
225 aforementioned subset nomenclature describes resting human CD8 T cells; for the purpose of  
226 longitudinal consistency we maintain this nomenclature yet we highlight that acutely activated  
227 human effector cells downregulate CCR7 and phenotypically coincide with EM and EMRA  
228 (Mahnke et al., 2013).

229

230 As previously described (Akondy et al., 2009), we observed massive expansion of  
231 A2/LLW-specific CD8 T cells with a peak around day 14 post-vaccination, with largely  
232 predominant CCR7- phenotypes (Figure 1B and C: “Total A2/LLW+”, “EM” and “EMRA”  
233 plots). Remarkably, detailed longitudinal quantification also showed expansion of CCR7+  
234 memory phenotype cells: both CM and SCM cells were clearly detected and expanded by day  
235 14 (Figure 1C and D). After the peak at day 14, EM cells contracted, while EMRA cells  
236 continued to increase slightly until day 28. At the later time-points, especially by 6 months, it  
237 was evident that EMRA and SCM subsets persisted, while EM and CM subsets continued to  
238 fade away. This later observation is in line with our previous report where the EMRA and SCM  
239 subsets were the two subsets predominantly detected in the long-term (range of years to

240 decades), the SCM cells being the most stable memory cell subset described so far (Fuentes  
241 Marraco et al., 2015).

242

243 In addition, we determined whether CCR7+ memory phenotype cells detected during the  
244 early phase post-vaccination co-existed with antigen, i.e. before viral clearance. Live-attenuated  
245 vaccine virus YF-17D was detectable at days 3 and/or 7 in the plasma of five out of the eight  
246 vaccinees (Figure 1D and Figure S1). The analysis was challenged by the fact that A2/LLW  
247 multimer positive cells were close to the limit of detection at baseline and at days 3 and 7 (only  
248 samples that showed total A2/LLW+ CD8 T cells superior to 0.01% of total CD8 T were  
249 further analyzed for subset distribution). In two donors, CM (in donor LAU 5088) and both CM  
250 and SCM (in donor LAU 5080) cells were detected at the same time-point when virus was  
251 detectable (Figure S1). These data show that cells with a memory phenotype can arise before  
252 antigen is cleared, well ahead of the contraction phase of the response.

253

254

### 255 **SCM and CM phenotype cells are activated at the peak of the response**

256

257 In parallel to the rise in frequencies, the acute phase of the T cell response is characterized  
258 by the expression of activation markers as previously described in total A2/LLW+ CD8 T cells  
259 (Akondy et al., 2009; Blom et al., 2013; Querec et al., 2009). In order to address how activation  
260 status compared across CD8 T cell subsets, we measured the longitudinal expression of  
261 activation markers: CD69, CD38, HLA-DR and PD1, within each subset. At the peak of the  
262 response (day 14), the analyses clearly showed that the CCR7+ memory subsets (SCM and  
263 CM) were extensively activated, in fact as much as the CCR7- EM and EMRA subsets (Figure  
264 2). The early activation marker CD69 was most highly expressed at days 3 and 7, while HLA-  
265 DR, CD38 and PD1 peaked at day 14 (Figure S2). Beyond day 14, CD38 clearly diminished  
266 while HLA-DR and PD1 partially persisted (Figure S2).

267

268 Of note, in the aforementioned longitudinal analyses, we observed that A2/LLW+ CD8 T  
269 cells were still present in the Naïve gate (as defined by CCR7+ CD45RA+ CD95-) after  
270 vaccination and that they remained relatively stable over time (Figure 1). Interestingly, these  
271 post-vaccination Naïve cells did show substantial activation at the peak of the response (Figure  
272 2 and S2). The nature of these Naïve-gated cells will be discussed.

273

274

## 275 **TCF1+ CD8 T cells preferentially persist for decades**

276

277 Given the central function of TCF1 in memory establishment (Gattinoni et al., 2009;  
278 Jeannet et al., 2010; Wu et al., 2016; Zhao et al., 2010; Zhou et al., 2010), we next monitored  
279 the expression of TCF1 in the various CD8 T cell subsets following YF-17D vaccination. First,  
280 by analyzing resting total CD8 T cells in a large number of donors (N=33), we observed a wide  
281 heterogeneity in TCF1 levels in human CCR7<sup>-</sup> CD8 T cell subsets (EM and EMRA). In line  
282 with mouse and human gene expression data (Crompton et al., 2015; Kratchmarov et al., 2018;  
283 Roychoudhuri et al., 2015; Willinger et al., 2006), we observed the hierarchical expression of  
284 TCF1: Naïve and memory subsets (including CM and SCM) expressed high levels of TCF1,  
285 while effector subsets (EM and EMRA) had low-to-negative levels of TCF1 (Figure 3). Similar  
286 to the inter-donor variability in subset distribution (Figure 3A and B), this single cell protein  
287 data in N=33 donors revealed that the fraction of TCF1<sup>+</sup> cells was widely variable within  
288 CCR7<sup>-</sup> subsets across donors (EM and EMRA, Figure 3C and D).

289

290 We then analyzed TCF1 expression in A2/LLW-specific CD8 T cells at various time-  
291 points following vaccination with YF-17D. In order to assess the early and very long-term  
292 phases of the response, we analyzed samples from the longitudinal cohort (N=8, up to 6 months  
293 post-vaccination) together with samples from the cross-sectional cohort (N=26, up to 23.7  
294 years post-vaccination, Table S1B : “Cross-sectional cohort : YF1 study” and Figure S3). In the  
295 first weeks, TCF1 positive frequencies sharply dropped in CCR7<sup>-</sup> subsets (EM and EMRA,  
296 Figure 4A and B), proving TCF1 downregulation during the acute response in humans in vivo.  
297 The maximum drop in TCF1 occurred at day 28 (Figure 4A and B), and appeared thus delayed  
298 relative to the activation peak at day 14 (Figure S2). After day 28, the CCR7<sup>-</sup> populations (EM  
299 or EMRA) showed a gradual increase in the percentages of TCF1<sup>+</sup> cells, particularly visible in  
300 the decade-persisting EM and EMRA cells (Figure 4B). In contrast, we observed that TCF1  
301 was maintained at high levels from baseline and throughout the observation time of two  
302 decades, in the three CCR7<sup>+</sup> subsets: Naïve, SCM and CM (Figure 4A and B). Based on  
303 longitudinal modeling of the percentage of TCF1<sup>+</sup> cells per subset and the comparison of the  
304 trends across subsets, the CCR7<sup>-</sup> subsets (EM and EMRA) were found to exhibit a distinct  
305 profile of TCF1 downregulation compared to TCF1 maintenance in CCR7<sup>+</sup> subsets (Naïve,  
306 SCM, and CM) (Figure 4C). While CM cells showed a trend closer to the trends in Naïve and  
307 SCM, they were statistically distinct to all subsets; the trends of Naïve and SCM were not  
308 distinguishable (Figure 4C).

309



310           Within the CCR7<sup>-</sup> subsets, we addressed whether the increase in the percentage of TCF1<sup>+</sup>  
311 cells in the longer-term was linked to an overall or a relative increase in TCF1<sup>+</sup> cells. We  
312 considered the frequencies of TCF1 positive or negative cells in each CCR7<sup>-</sup> subset in relation  
313 to the total CD8 T cells and from the peak of the response (day 14). We observed that : a) both  
314 TCF1<sup>+</sup> and TCF1<sup>-</sup> populations declined with time (Figure 4D), and b) TCF1<sup>+</sup> populations  
315 declined less than TCF1<sup>-</sup> populations (Figure 4D and E), in both EM and EMRA subsets.  
316 Rather than re-expression of TCF1 in CCR7<sup>-</sup> cells, these relative frequencies suggest that  
317 TCF1<sup>+</sup> cells persist better than TCF1<sup>-</sup> cells in the long-term.

318

319           We further studied the expression of the Interleukin 7 Receptor alpha chain (IL7Ra) in the  
320 EMRA subset and found a pattern of IL7Ra expression globally correlated to TCF1 expression  
321 (Figure 5 and S5). In particular, both TCF1 and IL7Ra were co-enriched in EMRA cells  
322 persisting beyond six months and further co-enriched when persisting over three years. Similar  
323 trends were observed for the EM populations; however, because the EM subset in total CD8 T  
324 cells inherently features a substantial fraction of IL7Ra<sup>+</sup> cells (as opposed to the scarcer  
325 fraction of IL7Ra<sup>+</sup> in total EMRA), the TCF1 and IL7Ra co-enrichment was not significant;  
326 CCR7<sup>+</sup> subsets express high levels of IL7Ra similar to high levels of TCF1<sup>+</sup> (data not shown).  
327 This is in line with our previous analysis where A2/LLW-specific EMRA but not A2/LLW-  
328 specific EM showed significant enrichment of the IL7Ra as compared to their counterparts in  
329 total CD8 T cells (Fuertes Marraco et al., 2015).

330

331

332           **SCM CD8 T cells appear phenotypically close to the Naïve baseline, while effectors burst**  
333 **out of baseline and gradually contract**

334

335           In order to detail the dynamics of the CD8 T cell response including multiple  
336 differentiation and activation markers, we applied multi-dimensionality reduction and  
337 unsupervised clustering to flow cytometry data using t-distributed Stochastic Neighbor  
338 Embedding (tSNE), and then further generated time-lapse representations. We applied this  
339 analysis strategy to samples from our longitudinal YF2 cohort, alone and in combination with  
340 long-term samples from the cross-sectional YF1 cohort. As detailed in the methods section,  
341 concatenated tSNE was possible for samples acquired with the same antibody panel and  
342 acquired under the same instrument configuration and normalized settings (Table S2).

343



344 First, tSNE was ran on single live total CD8 T cells from a pool of N=13 donors (non-  
345 acute samples), analyzing nine differentiation and activation markers: CCR7, CD45RA, CD95,  
346 TCF1, IL7Ra, PD1, CD69, CD38 and HLA-DR. The differentiation subsets were then gated  
347 using the standard strategy (Figure 6A, similar to Figure 1A) in order to locate them within the  
348 tSNE plots. The tSNE analysis of this CD8 T cell pool showed a distinct Naïve lobe, with SCM  
349 cells bridging this Naïve lobe into the remaining differentiation subsets, which were arranged in  
350 a gradient and formed a second lobe (Figure 6B : subset overlay, and C: individual subset  
351 populations). The localization of the subsets gated based on CCR7, CD45RA and CD95  
352 (Figure 6A) corresponded well with the tSNE clustering, including the expression patterns  
353 expected for the remaining six markers (Figure 6D) : for instance, IL7Ra and TCF1 were low  
354 while PD1 was high only in the CCR7- populations. In independent analyses, we analyzed  
355 N=16 donors, applying the 9-marker tSNE to each donor individually (Figure S6). We found  
356 that the pattern described above is reproducible across donors and tSNE runs, with donors  
357 showing variable sizes of the Naïve and differentiated lobes as expected based on the natural  
358 variability of the frequencies of CD8 T cell subsets (Figure 3). Of note, SCM were found in  
359 the bridge between lobes and also interspersed within the Naïve lobes.

360

361 We next applied this 9-marker tSNE analysis to longitudinal series of YF-17D vaccination  
362 samples, running tSNE individually for each donor (N=7 longitudinal datasets). The subset  
363 overlay tSNE plots were generated as in Figure 6, by gating subsets in each time-point of the  
364 longitudinal concatenated file (Figure S7). We then represented the tSNE of each time-point  
365 and generated time-lapse animations of the data. We found a remarkable pattern of the  
366 dynamics of CD8 T cell differentiation during YF-17D vaccination across donors: SCM cells  
367 appear and remain very close to the location of baseline Naïve cells (Figure 7A; Video 1  
368 showing N=7 subset overlays, and Video 2 showing each marker for donor LAU 5089 → *video*  
369 *links inserted here*). In contrast, effector CCR7- populations burst out of the baseline Naïve  
370 location, peaking their distance at days 14-28, and gradually contracting.

371

372 To address how do decade-persisting CD8 T cells compare to the early dynamics, in  
373 further analyses, we concatenated N=6 longitudinal series of early vaccination samples  
374 (longitudinal cohort, up to 6 months; 7 time-points per series) with N=13 samples from the  
375 long-term, cross-sectional study. We found that in both tSNE dimensions (x and y), the long-  
376 term samples also featured a population that located in the baseline region, as a prolongation of  
377 the Naïve cells at baseline and the cells that retain phenotypic proximity to this baseline region  
378 throughout vaccination (Figure 7B).

## 379 Discussion

380

381 To date, the differentiation pathways and fates of antigen-primed CD8 T cells are largely  
382 debated, a major question being whether memory cells establish in the first few days from  
383 precursors that diverge from effector fate or only later in the response from a fraction of acutely  
384 activated effector cells. With respect to the existing experimental evidence, one basic question  
385 still is : how early do memory subsets appear? Specifically concerning the more recently  
386 described SCM subset, the existing evidence is limited to one study using the macaque model  
387 of Simian Immunodeficiency Virus infection, where antigen-specific CD8 SCM cells are  
388 observed as early as day 7 of infection (supplementary data showing CM9/TL8-specific CD8 T  
389 cells in (Lugli et al., 2013)). Based on our clinical studies in YF-17D vaccinees, we show first  
390 evidence in humans, in vivo, that antigen-specific CD8 T memory cells including CM and  
391 SCM subsets are activated and expand during the acute phase of the response. The analysis of  
392 samples before day 14 was challenging due to the low frequencies of antigen-specific cells and  
393 due to the medical restrictions for blood withdrawals that precluded closer intervals in our  
394 study. Nevertheless, two donors showed rising memory cells as early as day 3 and 7, while  
395 virus was still detectable (day 3). Our data clearly exclude that memory subsets appear only  
396 once the antigen is cleared or after the acute peak, and provide evidence that cells with a  
397 memory phenotype establish early after priming, within the acute phase.

398

399 The particular value of this human experimental evidence is highlighted by the challenge  
400 in studying memory development based on phenotypic markers, and the fact that these markers  
401 globally vary between mouse and human systems. In the mouse, the major differentiation  
402 markers used are CD44 (for antigen-experienced) and CD62L (for Naïve and memory), as well  
403 as IL7Ra (naïve and memory including MPECs) and KLRG1 (terminally differentiated  
404 effectors and SLECs). Human CD8 T cell subsets are classically defined on the basis of CCR7  
405 and CD45RA (as detailed in the introduction). The SCM subset was first identified in the  
406 mouse as cells within the classic naïve-like gate that distinctly express IL2Rb, Bcl-2, CXCR3,  
407 and SCA-1 (Gattinoni et al., 2009). Human SCM are distinguished from Naïve by the positive  
408 expression of CD95 and CD58, whereas these two markers are not used in mice. Conversely,  
409 the mouse SCA-1 has no human ortholog. The markers CXCR3, IL2Rb and Bcl-2 used in mice  
410 are also considered positive in human SCM (Fuertes Marraco et al., 2015; Gattinoni et al.,  
411 2011; Lugli et al., 2013; 2012). However, these three later markers are poorly discriminative to  
412 distinguish SCM from Naïve cells: i) Bcl-2 is highly expressed in both Naïve and SCM  
413 (Gattinoni et al., 2011) (in contrast to downregulation in cycling effector cells (Miller et al.,

414 2008)), ii) IL2Rb is higher in SCM but requires visualization with a second marker for  
415 Naïve/SCM discrimination, in contrast to the distinct CD95+ staining of SCM cells versus  
416 CD95- signal in naïve cells (Gattinoni et al., 2011), and iii) CXCR3 shows high inter-donor  
417 variability and substantial positive signal even in cells that are CD58 and CD95 negative such  
418 as Melan-A-specific CD8 T cells in healthy donors, which are predominantly naïve (Fuertes  
419 Marraco et al., 2015). A major challenge is thus the availability and choice of markers to  
420 distinctly define and visualize memory subsets. Ontogeny questions that require adoptive  
421 transfer and tracing is extremely limited in humans (only studies in the context of bone marrow  
422 transplants have successfully traced SCM generation from transferred T cells (Cieri et al.,  
423 2015)) and mouse models are largely used to study CD8 T cell differentiation.  
424 Notwithstanding, the discrepancy of differentiation markers used in different model systems  
425 makes human data uniquely informative, as observations are complementary but not fully  
426 transferrable across systems such as mouse and human.

427

428 Historically, it has been particularly challenging to distinguish SCM from Naïve cells: SCM  
429 cells represent a recently identified memory subset, hidden within the classic Naïve (“naïve-  
430 like”) gate. Interestingly, in our experiments, we found that there was a relatively constant level  
431 of antigen-specific CD8 T cells that fell in the naïve gate (CCR7- CD45RA- CD95-) even  
432 following priming. A hypothesis could be that these post-vaccination Naïve-gated cells have  
433 not actually been primed – this would require a compensatory replenishment of naïve cells with  
434 this antigen specificity, sufficiently rapid to immediately replenish the cells that have been  
435 primed and therefore depleted from the naïve pool. Murray et al calculated that after age 20, the  
436 naïve pool is maintained by homeostatic proliferation rather than thymic output (Murray et al.,  
437 2003) – all our donors were aged over 20, and it would be undistinguishable to know whether  
438 the naïve-gated cells proliferate due to homeostasis or due to priming. To our knowledge, in  
439 fact, there is to date no marker that can definitely prove that a given CD8 T cell has been  
440 primed. In the mouse, CD44 is often used as a marker to distinguish differentiated cells, yet  
441 there is no proof that CD44 expression is truly correlative of antigen priming experience; there  
442 is neither no such equivalent marker conventionally used in human experiments. In previous  
443 studies including ours, there is evidence mainly substantiated from whole transcriptomic  
444 profiles, epigenetic imprints and functional assays, that subsets are arranged in a gradient,  
445 ordered from Naïve to SCM, CM, EM and EMRA (Crompton et al., 2015; Fuertes Marraco et  
446 al., 2015; Gattinoni et al., 2011; Mahnke et al., 2013). Intriguingly, we did observe that a  
447 substantial portion of cells in the naïve gate were undergoing activation, clearly visible at the  
448 peak of the response. In line with the argument that SCM amongst antigen-experienced cells

449 preserve highest “naïveness”, we hypothesize that the cells that remain in the naïve gate after  
450 priming may have been effectively primed but are memory cells that preserve a phenotype that  
451 is very close to the naïve, even closer than SCM. Recently, Costa del Amo et al. found  
452 subpopulations of SCM cells with distinct turn-over rates *in vivo* (Costa del Amo et al., 2018),  
453 which highlights further potential heterogeneity within subset gates, and in support of the  
454 differentiation continuum from naïve to memory to effector.

455

456 In our animated longitudinal tSNE analyses on nine standard activation and differentiation  
457 markers, it was particularly visible that a fraction of cells remained in the region where cells  
458 (Naïve) located at baseline. We observed YF-specific CD8 T cell subsets with phenotypes of  
459 naïve, memory (CM and SCM, CCR7+) or effector / effector memory (EM or EMRA, CCR7+)  
460 cells, and each of these subsets showed activation at the peak of the response and  
461 downregulated activation markers at later time-points. This observation highlights the  
462 importance of distinguishing between displaying a memory or effector phenotype and being in  
463 an activated or resting state. The progressive differentiation model does account for activated /  
464 effector phenotypes that may rise from each of the subsets (Mahnke et al., 2013). To-date,  
465 methodologies used in the study of CD8 T cell differentiation include the definition of memory  
466 cells solely on the basis of the time of sampling (meaning that all cells that are detected after  
467 the acute phase are memory cells), including studies in humans vaccinated with YF-17D  
468 (Akondy et al., 2017). In fact, our analyses show that there is wide heterogeneity in  
469 differentiation phenotypes very early on, with SCM cells appearing as a population that is  
470 phenotypically close to the naïve baseline and distinct from the burst of effector subsets at the  
471 peak of the response. Along these lines, a study in mice showed that CD8 T cells that have  
472 undergone the first division upon priming *in vivo* display transcriptional heterogeneity, with  
473 two main clusters with effector-like or memory-like profiles (Kakaradov et al., 2017). Our data  
474 shows phenotypic heterogeneity also in the very long-term, evidenced by the fact that EMRA  
475 cells are detectable decades after vaccination as a fraction of cells separate from SCM cells  
476 (Figure 1, Figure S3) (Fuertes Marraco et al., 2015). Even though they are phenotypically quite  
477 distinct (SCM versus EMRA), stem cell features such as long-term persistence and self-renewal  
478 are likely shared in these long-term populations, at least in a fraction of them. Interestingly, we  
479 found that it is the TCF1-expressing cells that preferentially persisted in the range of years-to-  
480 decades. This was pertinent not only for the SCM subset (TCF1 high from baseline and  
481 permanently thereafter) but also particularly visible in the fraction of TCF1+ cells within the  
482 EMRA subset that preferentially persisted long-term over TCF1- EMRA. The latter suggests

483 that TCF1 may generally support cellular persistence and thus also the maintenance of long-  
484 term effector cells that are readily available in the event of reinfection.

485

486 Another historical challenge is that the classic nomenclature of differentiation subsets  
487 based on CCR7 and CD45RA was primarily defined studying resting human T cells, where all  
488 non-naïve subsets are termed “memory”. This nomenclature does not phenotypically  
489 distinguish acutely activated effectors (CCR7-) from the “memory”-termed effector subsets EM  
490 (CCR7- CD45RA-) and EMRA (CCR7- CD45RA+) (Mahnke et al., 2013). Activation and  
491 cycling markers may distinguish acute phase effectors versus resting / long-term EM and  
492 EMRA: activated CCR7- cells (HLA-DR+ CD38+) would be effectors, and CCR7- cells that  
493 are HLA-DR- and CD38- would be EM/EMRA. However, how do we define the cells that  
494 show a combined memory (CCR7+) and activated phenotype, such as the SCM and CM  
495 subsets that we detected in the acute phase being as activated as effector CCR7- subsets? The  
496 longitudinal phenotyping we hereby present builds on the current nomenclature and marker  
497 definition of human CD8 T cell subsets and extends it by considering the activated (acute  
498 phase) versus resting states in complement with memory and/or effector markers.

499

500 Altogether, based on clinical studies on YF-17D vaccination, we provide first evidence in  
501 humans, *in vivo*, on the early appearance of SCM CD8 T cells. The SCM phenotype that  
502 predominantly and stably persists in the decade long-term is detectable within the first week,  
503 and shows activation and expansion during the early acute phase. The results support  
504 differentiation models where memory cells arise very early without an obligatory transition  
505 through a full effector phenotype stage, yet showing an activated state on top of a memory  
506 phenotype. This would be in line with the existence of a continuum of differentiation  
507 phenotypes, where long-term memory cells diverge from the full-blown effector burst and  
508 persist by preserving highest “naïveness” (proximity to the Naïve).

509

510

511 **Acknowledgements**

512

513 We thank Benton Lawson and the Centre for AIDS Research of Emory University (US) for the  
514 quantification of YFV load in plasma samples and the Flow Cytometry Facility of the  
515 University of Lausanne (CH) for cytometer instrument configuration and maintenance. We  
516 thank Nicole Montandon for technical assistant in processing blood specimens, and Paula  
517 Marcos Mondéjar for participating in the longitudinal study coordination. We thank Blaise  
518 Genton, Francine Widmer, Pierrette Meige and the personnel of the ‘Centre de vaccination et  
519 médecine des voyages’ at the PMU for the coordinated efforts and collaboration with us to  
520 receive the donors and withdraw blood specimens for the longitudinal study. Finally, we  
521 warmly thank all donors that volunteered and thus preciously contributed to our findings. This  
522 study was funded by Ludwig Cancer Research and the Cancer Research Institute (both N.Y.,  
523 U.S.A), the Swiss National Science Foundation (grants: 320030\_152856 to DES, 310030-  
524 179459 to DES, 310030B\_179570/B to WH).

525

526 **Author Contributions Statement**

527 SAFM, AB, WH and DES conceived and designed experiments, SAFM, HMEH, HOS, and  
528 DES elaborated the clinical study protocols, SAFM and AB performed experiments, SAFM,  
529 AB and SN analyzed data. All authors revised and approved the final version of the manuscript.

530

531 **Conflict of Interest Statement**

532 The authors declare that they have no conflicts of interest related to the publication of this  
533 manuscript.

534



## 535 References

536

- 537 Abdelsamed, H.A., Moustaki, A., Fan, Y., Dogra, P., Ghoneim, H.E., Zebley, C.C., Triplett,  
538 B.M., Sékaly, R.-P., Youngblood, B., 2017. Human memory CD8 T cell effector potential  
539 is epigenetically preserved during in vivo homeostasis. *Journal of Experimental Medicine*  
540 214, 1593–1606. doi:10.1002/(SICI)1521-4141(199901)29:01<284::AID-  
541 IMMU284>3.0.CO;2-C
- 542 Ahmed, R., Bevan, M.J., Reiner, S.L., Fearon, D.T., 2009. The precursors of memory: models  
543 and controversies. *Nat Rev Immunol* 9, 662–668. doi:10.1038/nri2619
- 544 Akondy, R.S., Fitch, M., Edupuganti, S., Yang, S., Kissick, H.T., Li, K.W., Ben A  
545 Youngblood, Abdelsamed, H.A., McGuire, D.J., Cohen, K.W., Alexe, G., Nagar, S.,  
546 McCausland, M.M., Gupta, S., Tata, P., Haining, W.N., McElrath, M.J., Zhang, D., Bin  
547 Hu, Greenleaf, W.J., Goronzy, J.J., Mulligan, M.J., Hellerstein, M., Ahmed, R., 2017.  
548 Origin and differentiation of human memory CD8 T cells after vaccination. *Nature* 552,  
549 362–367. doi:10.1038/nature24633
- 550 Akondy, R.S., Johnson, P.L.F., Nakaya, H.I., Edupuganti, S., Mulligan, M.J., Lawson, B.,  
551 Miller, J.D., Pulendran, B., Antia, R., Ahmed, R., 2015. Initial viral load determines the  
552 magnitude of the human CD8 T cell response to yellow fever vaccination. *Proceedings of*  
553 *the National Academy of Sciences* 112, 3050–3055. doi:10.1073/pnas.1500475112
- 554 Akondy, R.S., Monson, N.D., Miller, J.D., Edupuganti, S., Teuwen, D., Wu, H., Quyyumi, F.,  
555 Garg, S., Altman, J.D., Del Rio, C., Keyserling, H.L., Ploss, A., Rice, C.M., Orenstein,  
556 W.A., Mulligan, M.J., Ahmed, R., 2009. The Yellow Fever Virus Vaccine Induces a Broad  
557 and Polyfunctional Human Memory CD8+ T Cell Response. *The Journal of Immunology*  
558 183, 7919–7930. doi:10.4049/jimmunol.0803903
- 559 Bates, D., Mächler, M., Bolker, B., Walker, S., 2015. Fitting Linear Mixed-Effects Models  
560 Using lme4. *J. Stat. Soft.* 67. doi:10.18637/jss.v067.i01
- 561 Ben Youngblood, Hale, J.S., Kissick, H.T., Ahn, E., Xu, X., Wieland, A., Araki, K., West,  
562 E.E., Ghoneim, H.E., Fan, Y., Dogra, P., Davis, C.W., Konieczny, B.T., Antia, R., Cheng,  
563 X., Ahmed, R., 2017. Effector CD8 T cells dedifferentiate into long-lived memory cells.  
564 *Nature* 1–20. doi:10.1038/nature25144
- 565 Blom, K., Braun, M., Ivarsson, M.A., Gonzalez, V.D., Falconer, K., Moll, M., Ljunggren,  
566 H.G., Michaelsson, J., Sandberg, J.K., 2013. Temporal Dynamics of the Primary Human T  
567 Cell Response to Yellow Fever Virus 17D As It Matures from an Effector- to a Memory-  
568 Type Response. *The Journal of Immunology* 190, 2150–2158.  
569 doi:10.4049/jimmunol.1202234
- 570 Cieri, N., Oliveira, G., Greco, R., Forcato, M., Taccioli, C., Cianciotti, B., Valtolina, V.,  
571 Noviello, M., Vago, L., Bondanza, A., Lunghi, F., Markt, S., Bellio, L., Bordignon, C.,  
572 Bicciato, S., Peccatori, J., Ciceri, F., Bonini, C., 2015. Generation of human memory stem  
573 T cells upon haploidentical T-replete hematopoietic stem cell transplantation. *Blood*.  
574 doi:10.1182/blood-2014-11-608539
- 575 Costa del Amo, P., Lahoz-Beneytez, J., Boelen, L., Ahmed, R., Miners, K.L., Zhang, Y.,  
576 Roger, L., Jones, R.E., Marraco, S.A.F., Speiser, D.E., Baird, D.M., Price, D.A., Ladell, K.,  
577 Macallan, D., Asquith, B., 2018. Human TSCM cell dynamics in vivo are compatible with  
578 long-lived immunological memory and stemness. *Plos Biol* 16, e2005523.  
579 doi:10.1371/journal.pbio.2005523.s010
- 580 Crauste, F., Mafille, J., Boucinha, L., Djebali, S., Gandrillon, O., Marvel, J., Arpin, C., 2017.  
581 Identification of Nascent Memory CD8 T Cells and Modeling of Their Ontogeny. *Cell*  
582 *Systems* 4, 306–317.e4. doi:10.1016/j.cels.2017.01.014
- 583 Crompton, J.G., Narayanan, M., Cuddapah, S., Roychoudhuri, R., Ji, Y., Yang, W., Patel, S.J.,  
584 Sukumar, M., Palmer, D.C., Peng, W., Wang, E., Marincola, F.M., Klebanoff, C.A., Zhao,  
585 K., Tsang, J.S., Gattinoni, L., Restifo, N.P., 2015. Lineage relationship of CD8(+) T cell

- 586 subsets is revealed by progressive changes in the epigenetic landscape. *Cell Mol Immunol*.  
587 doi:10.1038/cmi.2015.032
- 588 Danilo, M., Chennupati, V., Silva, J.G., Siegert, S., Held, W., 2018. Suppression of Tcf1 by  
589 Inflammatory Cytokines Facilitates Effector CD8 T Cell Differentiation. *Cell Rep* 22,  
590 2107–2117. doi:10.1016/j.celrep.2018.01.072
- 591 de Melo, A.B., Nascimento, E.J.M., Braga-Neto, U., Dhalaria, R., Silva, A.M., Oelke, M.,  
592 Schneck, J.P., Sidney, J., Sette, A., Montenegro, S.M.L., Marques, E.T.A., 2013. T-cell  
593 memory responses elicited by yellow fever vaccine are targeted to overlapping epitopes  
594 containing multiple HLA-I and -II binding motifs. *PLoS Negl Trop Dis* 7, e1938.  
595 doi:10.1371/journal.pntd.0001938
- 596 Farber, D.L., Yudanin, N.A., Restifo, N.P., 2013. Human memory T cells: generation,  
597 compartmentalization and homeostasis. *Nat Rev Immunol* 14, 24–35. doi:10.1038/nri3567
- 598 Fridman, W.H., Pagès, F., Sautès-Fridman, C., Galon, J., 2012. The immune contexture in  
599 human tumours: impact on clinical outcome. *Nature Publishing Group* 12, 298–306.  
600 doi:10.1038/nrc3245
- 601 Fuertes Marraco, S.A., Soneson, C., Cagnon, L., Gannon, P.O., Allard, M., Maillard, S.A.,  
602 Montandon, N., Rufer, N., Waldvogel, S., Delorenzi, M., Speiser, D.E., 2015. Long-lasting  
603 stem cell-like memory CD8+ T cells with a naïve-like profile upon yellow fever  
604 vaccination. *Science Translational Medicine* 7, 282ra48. doi:10.1126/scitranslmed.aaa3700
- 605 Gattinoni, L., Klebanoff, C.A., Restifo, N.P., 2012. Paths to stemness: building the ultimate  
606 antitumour T cell. *Nat Rev Cancer* 12, 671–684. doi:10.1038/nrc3322
- 607 Gattinoni, L., Lugli, E., Ji, Y., Pos, Z., Paulos, C.M., Quigley, M.F., Almeida, J.R., Gostick, E.,  
608 Yu, Z., Carpenito, C., Wang, E., Douek, D.C., Price, D.A., June, C.H., Marincola, F.M.,  
609 Roederer, M., Restifo, N.P., 2011. A human memory T cell subset with stem cell-like  
610 properties. *Nature Medicine* 17, 1290–1297. doi:10.1038/nm.2446
- 611 Gattinoni, L., Zhong, X.-S., Palmer, D.C., Ji, Y., Hinrichs, C.S., Yu, Z., Wrzesinski, C., Boni,  
612 A., Cassard, L., Garvin, L.M., Paulos, C.M., Muranski, P., Restifo, N.P., 2009. Wnt  
613 signaling arrests effector T cell differentiation and generates CD8+ memory stem cells.  
614 *Nature Publishing Group* 15, 808–813. doi:10.1038/nm.1982
- 615 Gray, S.M., Kaech, S.M., Staron, M.M., 2014. The interface between transcriptional and  
616 epigenetic control of effector and memory CD8(+) T-cell differentiation. *Immunological*  
617 *Reviews* 261, 157–168. doi:10.1111/imr.12205
- 618 Henning, A.N., Roychoudhuri, R., Restifo, N.P., 2018. Epigenetic control of CD8. *Nat Rev*  
619 *Immunol* 18, 340–356. doi:10.1038/nri.2017.146
- 620 Jeannet, G., Boudousquie, C., Gardiol, N., Kang, J., Huelsken, J., Held, W., 2010. Essential  
621 role of the Wnt pathway effector Tcf-1 for the establishment of functional CD8 T cell  
622 memory. *Proceedings of the National Academy of Sciences* 107, 9777–9782.  
623 doi:10.1073/pnas.0914127107
- 624 Kaech, S.M., Cui, W., 2012. Transcriptional control of effector and memory CD8+ T cell  
625 differentiation. *Nat Rev Immunol* 12, 749–761. doi:10.1038/nri3307
- 626 Kakaradov, B., Arsenio, J., Widjaja, C.E., He, Z., Aigner, S., Metz, P.J., Yu, B., Wehrens, E.J.,  
627 Lopez, J., Kim, S.H., Zuniga, E.I., Goldrath, A.W., Chang, J.T., Yeo, G.W., 2017. Early  
628 transcriptional and epigenetic regulation of CD8+ T cell differentiation revealed by single-  
629 cell RNA sequencing. *Nature Immunology* 18, 422–432. doi:10.1016/j.molcel.2010.05.004
- 630 Kratchmarov, R., Magun, A.M., Reiner, S.L., 2018. TCF1 expression marks self-renewing  
631 human CD8+ T cells. *Blood Adv* 2, 1685–1690. doi:10.1182/bloodadvances.2018016279
- 632 Lefrançois, L., Obar, J.J., 2010. Once a killer, always a killer: from cytotoxic T cell to memory  
633 cell. *Immunological Reviews* 235, 206–218. doi:10.1111/j.0105-2896.2010.00895.x
- 634 Lugli, E., Dominguez, M.H., Gattinoni, L., Chattopadhyay, P.K., Bolton, D.L., Song, K., Klatt,  
635 N.R., Brenchley, J.M., Vaccari, M., Gostick, E., Price, D.A., Waldmann, T.A., Restifo,  
636 N.P., Franchini, G., Roederer, M., 2013. Superior T memory stem cell persistence supports  
637 long-lived T cell memory. *J. Clin. Invest.* doi:10.1172/JCI66327DS1



- 638 Lugli, E., Gattinoni, L., Roberto, A., Mavilio, D., Price, D.A., Restifo, N.P., Roederer, M.,  
639 2012. Identification, isolation and in vitro expansion of human and nonhuman primate T  
640 stem cell memory cells. *Nat Protoc* 8, 33–42. doi:10.1038/nprot.2012.143
- 641 Mahnke, Y.D., Brodie, T.M., Sallusto, F., Roederer, M., Lugli, E., 2013. The who's who of T-  
642 cell differentiation: human memory T-cell subsets. *Eur. J. Immunol.* 43, 2797–2809.  
643 doi:10.1002/eji.201343751
- 644 Marraco, S.A.F., Soneson, C., Delorenzi, M., Speiser, D.E., 2015. Genomics Data. *GDATA* 5,  
645 297–301. doi:10.1016/j.gdata.2015.06.024
- 646 Miller, J.D., van der Most, R.G., Akondy, R.S., Glidewell, J.T., Albott, S., Masopust, D.,  
647 Murali-Krishna, K., Mahar, P.L., Edupuganti, S., Lalor, S., Germon, S., Del Rio, C.,  
648 Mulligan, M.J., Staprans, S.I., Altman, J.D., Feinberg, M.B., Ahmed, R., 2008. Human  
649 effector and memory CD8+ T cell responses to smallpox and yellow fever vaccines.  
650 *Immunity* 28, 710–722. doi:10.1016/j.immuni.2008.02.020
- 651 Moulton, V.R., Farber, D.L., 2006. Committed to memory: lineage choices for activated T  
652 cells. *Trends in Immunology* 27, 261–267. doi:10.1016/j.it.2006.04.006
- 653 Murray, J.M., Kaufmann, G.R., Hodgkin, P.D., Lewin, S.R., Kelleher, A.D., Davenport, M.P.,  
654 Zaunders, J.J., 2003. Naive T cells are maintained by thymic output in early ages but by  
655 proliferation without phenotypic change after age twenty. *Immunology and Cell Biology*  
656 81, 487–495. doi:10.1046/j.1440-1711.2003.01191.x
- 657 Opat, M.M., Stephens, R., 2013. Early Decision: Effector and Effector Memory T Cell  
658 Differentiation in Chronic Infection. *Curr Immunol Rev* 9, 190–206.  
659 doi:10.2174/1573395509666131126231209
- 660 Pace, L., Goudot, C., Zueva, E., Gueguen, P., Burgdorf, N., Waterfall, J.J., Quivy, J.-P.,  
661 Almouzni, G., Amigorena, S., 2018. The epigenetic control of stemness in CD8+T cell fate  
662 commitment. *Science* 359, 177–186. doi:10.1126/science.aah6499
- 663 Pulendran, B., Oh, J.Z., Nakaya, H.I., Ravindran, R., Kazmin, D.A., 2013. Immunity to viruses:  
664 learning from successful human vaccines. *Immunological Reviews* 255, 243–255.  
665 doi:10.1111/imr.12099
- 666 Querec, T.D., Akondy, R.S., Lee, E.K., Cao, W., Nakaya, H.I., Teuwen, D., Pirani, A., Gernert,  
667 K., Deng, J., Marzolf, B., Kennedy, K., Wu, H., Bennouna, S., Oluoch, H., Miller, J.,  
668 Vencio, R.Z., Mulligan, M., Aderem, A., Ahmed, R., Pulendran, B., 2009. Systems biology  
669 approach predicts immunogenicity of the yellow fever vaccine in humans. *Nature*  
670 Publishing Group 10, 116–125. doi:10.1038/ni.1688
- 671 Restifo, N.P., Gattinoni, L., 2013. Lineage relationship of effector and memory T cells. *Current*  
672 *Opinion in Immunology* 25, 556–563. doi:10.1016/j.coi.2013.09.003
- 673 Ribas, A., Wolchok, J.D., 2018. Cancer immunotherapy using checkpoint blockade. *Science*  
674 359, 1350–1355. doi:10.1126/science.aar4060
- 675 Roychoudhuri, R., Lefebvre, F., Honda, M., Pan, L., Ji, Y., Klebanoff, C.A., Nichols, C.N.,  
676 Fourati, S., Hegazy, A.N., Goulet, J.-P., Gattinoni, L., Nabel, G.J., Gilliet, M., Cameron,  
677 M., Restifo, N.P., Sékaly, R.P., Flatz, L., 2015. Transcriptional profiles reveal a stepwise  
678 developmental program of memory CD8+ T cell differentiation. *Vaccine* 33, 914–923.  
679 doi:10.1016/j.vaccine.2014.10.007
- 680 Sallusto, F., Geginat, J., Lanzavecchia, A., 2004. Central memory and effector memory T cell  
681 subsets: function, generation, and maintenance. *Annu. Rev. Immunol.* 22, 745–763.  
682 doi:10.1146/annurev.immunol.22.012703.104702
- 683 Utzschneider, D.T., Charmoy, M., Chennupati, V., Pousse, L., Ferreira, D.P., Calderon-Copete,  
684 S., Danilo, M., Alfei, F., Hofmann, M., Wieland, D., Pradervand, S., Thimme, R., Zehn,  
685 D., Held, W., 2016. T Cell Factor 1-Expressing Memory-like CD8. *Immunity* 45, 415–427.  
686 doi:10.1016/j.immuni.2016.07.021
- 687 Willinger, T., Freeman, T., Herbert, M., Hasegawa, H., McMichael, A.J., Callan, M.F.C., 2006.  
688 Human naive CD8 T cells down-regulate expression of the WNT pathway transcription  
689 factors lymphoid enhancer binding factor 1 and transcription factor 7 (T cell factor-1)

690 following antigen encounter in vitro and in vivo. *J. Immunol.* 176, 1439–1446.  
691 Wu, T., Ji, Y., Moseman, E.A., Xu, H.C., Mangani, M., Kirby, M., Anderson, S.M., Handon,  
692 R., Kenyon, E., Elkahloun, A., Wu, W., Lang, P.A., Gattinoni, L., McGavern, D.B.,  
693 Schwartzberg, P.L., 2016. The TCF1-Bcl6 axis counteracts type I interferon to repress  
694 exhaustion and maintain T cell stemness. *Sci Immunol* 1. doi:10.1126/sciimmunol.aai8593  
695 Yuzefpolskiy, Y., Baumann, F.M., Kalia, V., Sarkar, S., 2014. Early CD8 T-cell memory  
696 precursors and terminal effectors exhibit equipotent in vivo degranulation. *Cell Mol*  
697 *Immunol* 12, 400–408. doi:10.4049/jimmunol.174.9.5341  
698 Zhao, D.-M., Yu, S., Zhou, X., Haring, J.S., Held, W., Badovinac, V.P., Harty, J.T., Xue, H.-  
699 H., 2010. Constitutive activation of Wnt signaling favors generation of memory CD8 T  
700 cells. *The Journal of Immunology* 184, 1191–1199. doi:10.4049/jimmunol.0901199  
701 Zhou, X., Yu, S., Zhao, D.-M., Harty, J.T., Badovinac, V.P., Xue, H.-H., 2010. Differentiation  
702 and persistence of memory CD8(+) T cells depend on T cell factor 1. *Immunity* 33, 229–  
703 240. doi:10.1016/j.immuni.2010.08.002  
704

## 705 **Figure legends**

706

707 **Figure 1. Quantification of A2/LLW-specific CD8 T cell subsets during the first six**  
708 **months after YF-17D vaccination. (A)** Flow cytometry gating strategy to define CD8 T cell  
709 subsets : Central memory (CM : CCR7<sup>+</sup> CD45RA<sup>-</sup>), Effector memory (EM : CCR7<sup>-</sup> CD45RA<sup>-</sup>  
710 ) and Effector memory CD45RA<sup>+</sup> (EMRA : CCR7<sup>-</sup> CD45RA<sup>+</sup>) cells; CCR7 and CD45RA  
711 double positive (DP) cells are further subdivided into Naïve (CD95<sup>-</sup>) and stem cell-like (SCM,  
712 CD95<sup>+</sup>) subsets. **(B)** Flow cytometry analysis of A2/LLW tetramer<sup>+</sup> CD8 T cells, showing the  
713 7 longitudinal time-points of the representative donor (LAU 5089) : CD8<sup>+</sup> A2/LLW tetramer<sup>+</sup>  
714 cells were analyzed for subset distribution as in A. **(C) and (D)** Quantification of the frequency  
715 of A2/LLW tetramer<sup>+</sup> within total peripheral CD8 T cells, in N=8 donors with 7 longitudinal  
716 time-points. In C, frequencies are shown for total A2/LLW<sup>+</sup> or per A2/LLW<sup>+</sup> subset, and each  
717 donor is line-connected across its dotted time-points. In D, the data is pooled showing average  
718 and standard error of the mean (N=8) per population as indicated (left y-axis) ; viral load data is  
719 complemented (right y-axis). The dotted line in C and D indicates the multimer detection  
720 threshold of 0.01% of total CD8 T cells. Time-points are BL : baseline, D3 : Day 3, D7 : Day 7,  
721 D14 : Day 14, D28 : Day 28, M3 : circa 3 months, M6 : circa 6 months (Table S1 shows full  
722 details of the cohort).

723

724 **Figure 2. Activation of A2/LLW-specific CD8 T cell subsets at the peak of the response.**  
725 **(A)** Flow cytometry profiles at day 14 showing each activation marker and subset, as  
726 indicated ; total CD8 T cells are shown as a reference. The data are from donor LAU 5089.  
727 **(B)** Pie charts showing frequencies of the combinatorial expression of the four indicated  
728 activation markers, per subset : each arc designates one marker, each slice a number of markers  
729 co-expressed (representation based on SPICE software). N=7 donors were analyzed at day 14  
730 post-vaccination and only detectable populations were quantified : in Naïve (n=4/7), SCM  
731 (n=7/7), CM (n=7/7), EM (n=7/7), EMRA (n=7/7). P-values (built-in t-test in SPICE) : ns = not  
732 significant, \* < 0.05, \*\* < 0.01, \*\*\* < 0.001.

733

734 **Figure 3. Patterns of subset distribution and TCF1 expression in human CD8 T cells**  
735 **across donors. (A).** Flow cytometry analyses of CD8 T cells for subset composition showing 3  
736 representative plots, and **(B)** quantitated subset frequencies in N=33 donors. **(C).** Offset overlay  
737 histograms for TCF1 expression amongst CD8 T cell subsets showing 3 examples. **(D)**  
738 Frequencies for TCF1 expression in peripheral total CD8 T cell subsets from N=33 donors;  
739 these correspond to non-activated cells (unvaccinated or over 6 months after vaccination).

740 Comparative p-values are shown in matrix format below each x-axis label, based on a Friedman  
741 test (non-parametric, paired) : ns = not significant, trend = 0.05 to <0.10, \* < 0.05, \*\* < 0.01,  
742 \*\*\* < 0.001.

743

744 **Figure 4. Dynamics of TCF1 expression in A2/LLW-specific CD8 T cell subsets in the**  
745 **early and late phases after YF-17D vaccination. (A)** Flow cytometry profiles of TCF1  
746 expression, longitudinally in the first 6 months after vaccination, in each subset. Overlay  
747 histograms show the A2/LLW multimer+ CD8 T cells in open line (colored per subset; absence  
748 denotes a non-detectable population) and the total CD8 T cell reference in grey fill below.  
749 Donor LAU 5081 is shown. **(B)** Frequencies of TCF1 expression in the various A2/LLW-  
750 specific CD8 T cell subsets, longitudinally in N=8 vaccinees in the early phase (first six  
751 months, line-connected dots per donor) and N= 26 vaccinees for the late phase (cross-sectional  
752 cohort: from 4 months to 23.7 years); total N=82 samples. P-values are based on Kruskal-  
753 Wallis (unpaired, non-parametric) for multiple comparisons amongst time-line groups,  
754 distributed as shown in Figure S4. **(C)** Statistical comparison of the % of TCF1+ cells per  
755 subset based on longitudinal modeling of the data (same dataset as in panel B) and Bonferroni  
756 adjustment of the pairwise p-values. **(D) and (E)** Frequencies of TCF1+ and TCF1-  
757 populations of A2/LLW-specific EM or EMRA subsets amongst total peripheral CD8 T cells.  
758 Corresponding linear regressions with least squares fit are shown for data from the peak of the  
759 response (at day 14). In D, the best-fit and standard error of the slopes from TCF1+ or TCF1-  
760 are compared, within each effector subset, with t-test p-values indicated. ns = not significant,  
761 trend = 0.05 to <0.10, \* < 0.05, \*\* < 0.01, \*\*\* < 0.001.

762

763 **Figure 5. IL7Ra co-enriches with TCF1 in the long-term in A2/LLW-specific EMRA cells.**  
764 Pie charts showing frequencies of the combinatorial expression of IL7Ra and TCF1 in the  
765 EMRA subset. Baseline EMRA correspond to EMRA from total CD8 T cells. Thereafter, post-  
766 vaccination EMRA populations that are A2/LLW-specific are shown (these are non- or  
767 insufficiently detectable for analysis before day 14). P-values (built-in t-test in SPICE,  
768 comparing to baseline) : ns = not significant, \* < 0.05, \*\* < 0.01, \*\*\* < 0.001.

769

770 **Figure 6. Gradient of differentiation in total CD8 T cells validated by t-Stochastic**  
771 **Neighbor Embedding (tSNE) of flow cytometry data.** Total CD8 T cells from N=13 donors  
772 (ranging from 8.5 months to 23.7 years after vaccination, i.e. no acute phase samples) were  
773 analyzed with the tSNE plugin from FlowJo **(A)** Analysis strategy : single live CD8 T cells  
774 from each donor were downsampled to 5'000 events and the sum of N=13 donors were

775 concatenated into a single file (70'000 events). This file was then gated and color-coded for the  
776 differentiation subsets as previously described (Figure 1A). **(B) and (C)** The N=13 concatenate  
777 was analyzed by tSNE using the plugin from FlowJo v10, reducing nine parameters (CCR7,  
778 CD45RA, CD95, TCF1, IL7Ra, PD1, CD69, HLA-DR, CD38) to two dimensions (tSNE x- and  
779 y- axes). Shown is the resulting unsupervised clustering tSNE plot, with the overlay (in B) or  
780 individual plots (in C) of the differentiation subsets gated as in panel A. **(D)** The tSNE plots  
781 showing the heatmap (based on median) of each marker, as indicated.

782

783 **Figure 7. Time-lapse dynamics of CD8 T cell differentiation showing effector cell burst**  
784 **and permanent memory cell establishment during YF-17D vaccination.** **(A)** N=7 donors  
785 were individually analyzed, performing tSNE analyses on the longitudinal data series : for each  
786 donor dataset, all the single live A2/LLW-specific CD8 T cell flow cytometry events acquired  
787 were concatenated and individually ran for tSNE. The resulting tSNE plots are shown for each  
788 time-point (gated based on sample ID). Samples from donor LAU 5096 were stained with a  
789 different antibody panel (« panel D ») compared to all other donors (stained with « panel C »),  
790 as detailed in Table S2. **(B)** Single live A2/LLW-specific CD8 T cells from a pool of N=55  
791 samples acquired with the same flow cytometry panel and instrument configuration were  
792 concatenated and ran for tSNE. These included: N=6 donors (D1 to D6) with longitudinal data  
793 (7 time-points: BL, D3, D7, D14, D28, M3 and M6 in each sequence) together with N=13  
794 donors from the cross-sectional cohort (grouped according to years since vaccination), as  
795 indicated. Shown are the plots of the calculated tSNE (either x- or y- dimension) versus sample  
796 ID. The black-bordered rectangle indicates the areas of permanency throughout vaccination.

797

798 **Video 1. “N=7 subsets”: Dynamics of the differentiation of A2/LLW-specific CD8 T cells**  
799 **during YF-17D vaccination, showing subset composition for N=7 donors.** Time-lapse  
800 animation of the longitudinal tSNE analysis with subset overlays in N=7 donors, as indicated.  
801 Each donor sequence is spaced by 1 second, showing subset composition, and starting from  
802 Baseline, then Day 3, Day 7, Day 14, Day 28, circa 3 Months and circa 6 Months after YF-17D  
803 vaccination. For each donor, all the single live A2/LLW-specific CD8 T cell events acquired  
804 were concatenated and ran for the 9-marker tSNE.

805

806 **Video 2. “LAU 5089 markers”: Dynamics of the differentiation of A2/LLW-specific CD8**  
807 **T cells during YF-17D vaccination, showing each of the 9 markers for vaccinee LAU**  
808 **5089.** Time-lapse animation of the longitudinal tSNE analysis of donor LAU5089, showing  
809 sequences starting from Baseline, then Day 3, Day 7, Day 14, Day 28, Day 84 (ca. 3 months)

810 and Day 185 (ca. 6 months) after YF-17D vaccination. Each sequence is spaced by 1 second,  
811 and shows subset overlay or the indicated heatmapped marker. All the single live A2/LLW-  
812 specific CD8 T cell events acquired were concatenated and ran for the 9-marker tSNE.

813

814 **Figure S1. Longitudinal differentiation of A2/LLW-specific CD8 T cells in donors with**  
815 **detectable Yellow Fever viral load.** Data are quantified as in Figure 1D, showed for each  
816 individual donor that showed positive Yellow Fever viral load (N=5 out of 8 donors).

817

818 **Figure S2. Longitudinal analysis of activation markers in A2/LLW-specific CD8 T cell**  
819 **subsets.** The analysis is performed as in Figure 2, showing all time-points. The pie charts are  
820 translucent for the time-points and subsets with less than 3 donors with interpretable data. N  
821 values are indicated below each pie chart. P-values (built-in t-test in SPICE, comparing subsets  
822 within each time-point) : ns = not significant, \* < 0.05, \*\* < 0.01, \*\*\* < 0.001.

823

824 **Figure S3. Frequencies of A2/LLW-specific CD8 T cell subsets in subjects of the cross-**  
825 **sectional cohort.** The frequency of A2/LLW-specific CD8 T cells within each subset is shown  
826 for the cross-sectional donors (analyzed in Figures 3 to 7 in combination with donors of the  
827 longitudinal cohort).

828

829 **Figure S4: Expression of TCF1 in A2/LLW-specific CD8 T cells of donors from the**  
830 **longitudinal and cross-sectional cohorts.** Donors were grouped according to various time  
831 intervals since vaccination, each dot representing one donor. P-values: ns = not significant,  
832 trend = 0.05 to <0.10, \* < 0.05, \*\* < 0.01, \*\*\* < 0.001, after Kruskal-Wallis multiple  
833 comparisons (unpaired, non-parametric).

834

835 **Figure S5. TCF1 and IL7Ra co-expression in total and A2/LLW-specific EMRA cells**  
836 **early and long-term after YF-17D vaccination.** Data are analyzed as in Figure 5, showing the  
837 data corresponding to either total or A2/LLW-specific EMRA cells, in the various time-point  
838 groups. P-values (built-in t-test in SPICE, comparing total versus A2/LLW-specific within each  
839 time-point group) : ns = not significant, trend = 0.05 to <0.10, \* < 0.05, \*\* < 0.01, \*\*\* < 0.001.

840

841 **Figure S6. Individual yet conserved tSNE pattern of differentiation subsets in total CD8 T**  
842 **cells.** A downsample of 75'000 single live total CD8 T cells was exported for each of the N=16  
843 donors, individually running tSNE and analyzing each donor (gated and represented as in  
844 Figure 6B). The first N=13 donors correspond to the group analyzed in Figure 6 (ranging from

845 8.5 months to 23.7 years after vaccination, i.e. no acute phase samples); data of N=3 additional  
846 donors (ranging from 10.5 to 13.8 years after vaccination) originate from a different antibody  
847 panel configuration (“panel D”, see Table S2).

848

849 **Figure S7. Longitudinal dynamics of subset composition and marker expression from the**  
850 **tSNE analysis of donor LAU 5089. (A)** For each donor dataset, all the single live A2/LLW-  
851 specific CD8 T cell flow cytometry events were concatenated and individually ran for tSNE :  
852 this generates a tSNE plot of all events. Each time-point is then gated based on sample ID, and  
853 subsets further gated and color-coded as detailed in Figure 6A. **(B)** Longitudinal tSNE plots  
854 showing the heatmap (based on median) of each marker, as indicated.

855

856

857

858 **Supplementary Material :**

859

860 **Figure S1**

861 **Figure S2**

862 **Figure S3**

863 **Figure S4**

864 **Figure S5**

865 **Figure S6**

866 **Figure S7**

867 **Supplementary figure legends**

868 **Table S1**

869 **Table S2**

870 **Table S3**

871



Figure 1

bioRxiv preprint doi: <https://doi.org/10.1101/808774>; this version posted October 17, 2019. The copyright holder for this preprint (which was not certified by peer review) is the author/funder, who has granted bioRxiv a license to display the preprint in perpetuity. It is made available under aCC-BY-NC-ND 4.0 International license.

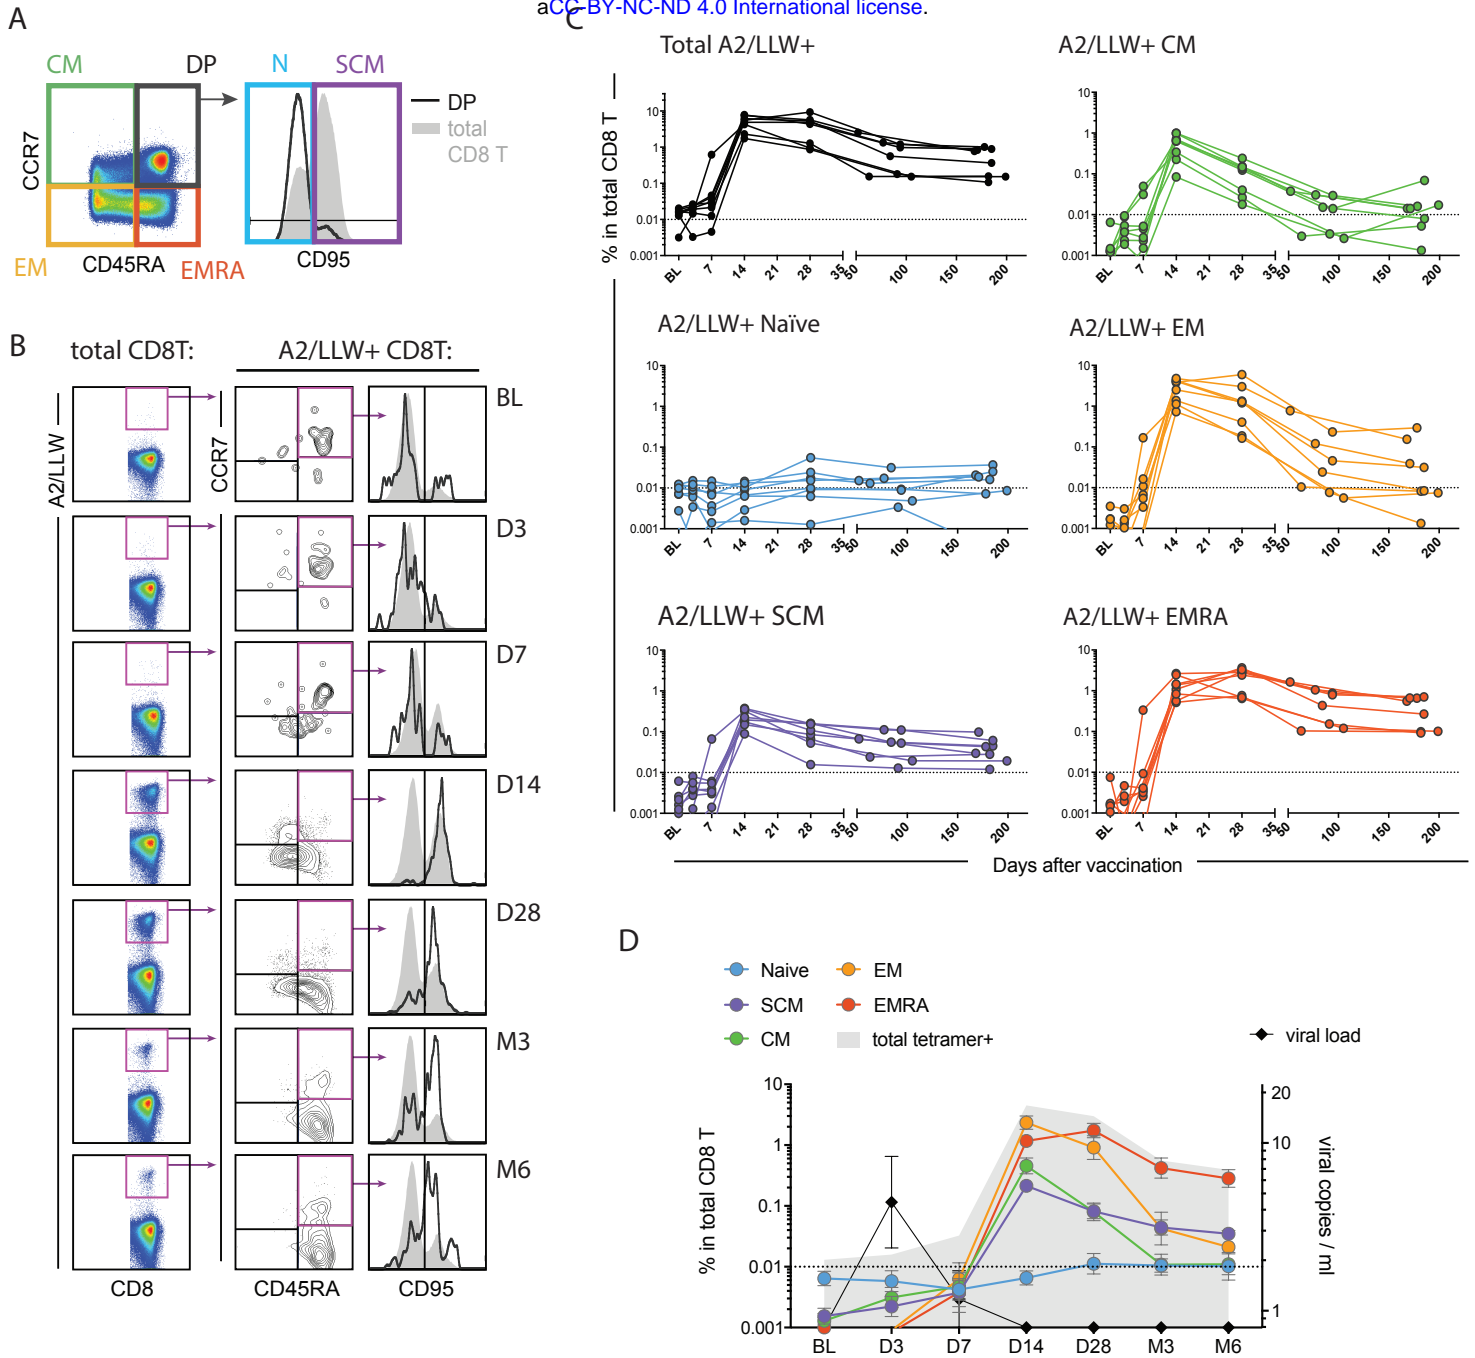



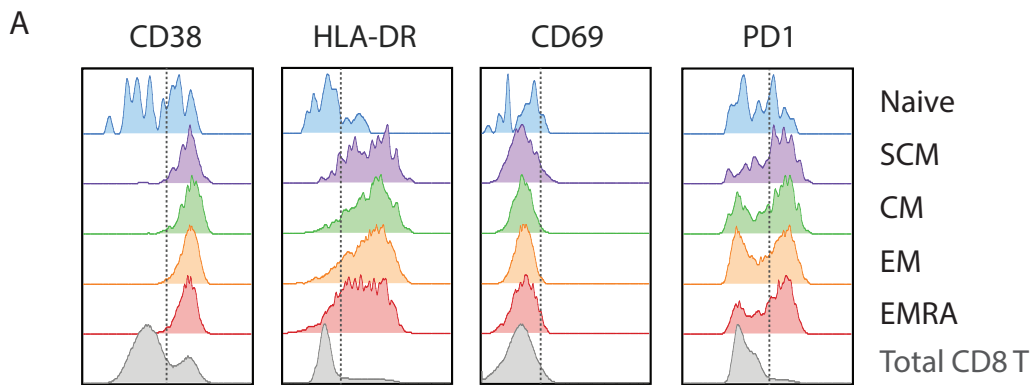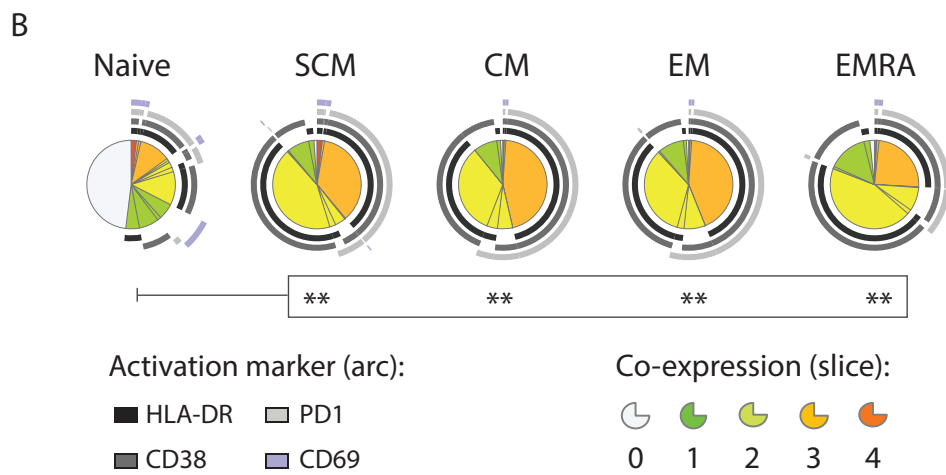

Figure 3

bioRxiv preprint doi: <https://doi.org/10.1101/808774>; this version posted October 17, 2019. The copyright holder for this preprint (which was not certified by peer review) is the author/funder, who has granted bioRxiv a license to display the preprint in perpetuity. It is made available under aCC-BY-NC-ND 4.0 International license.

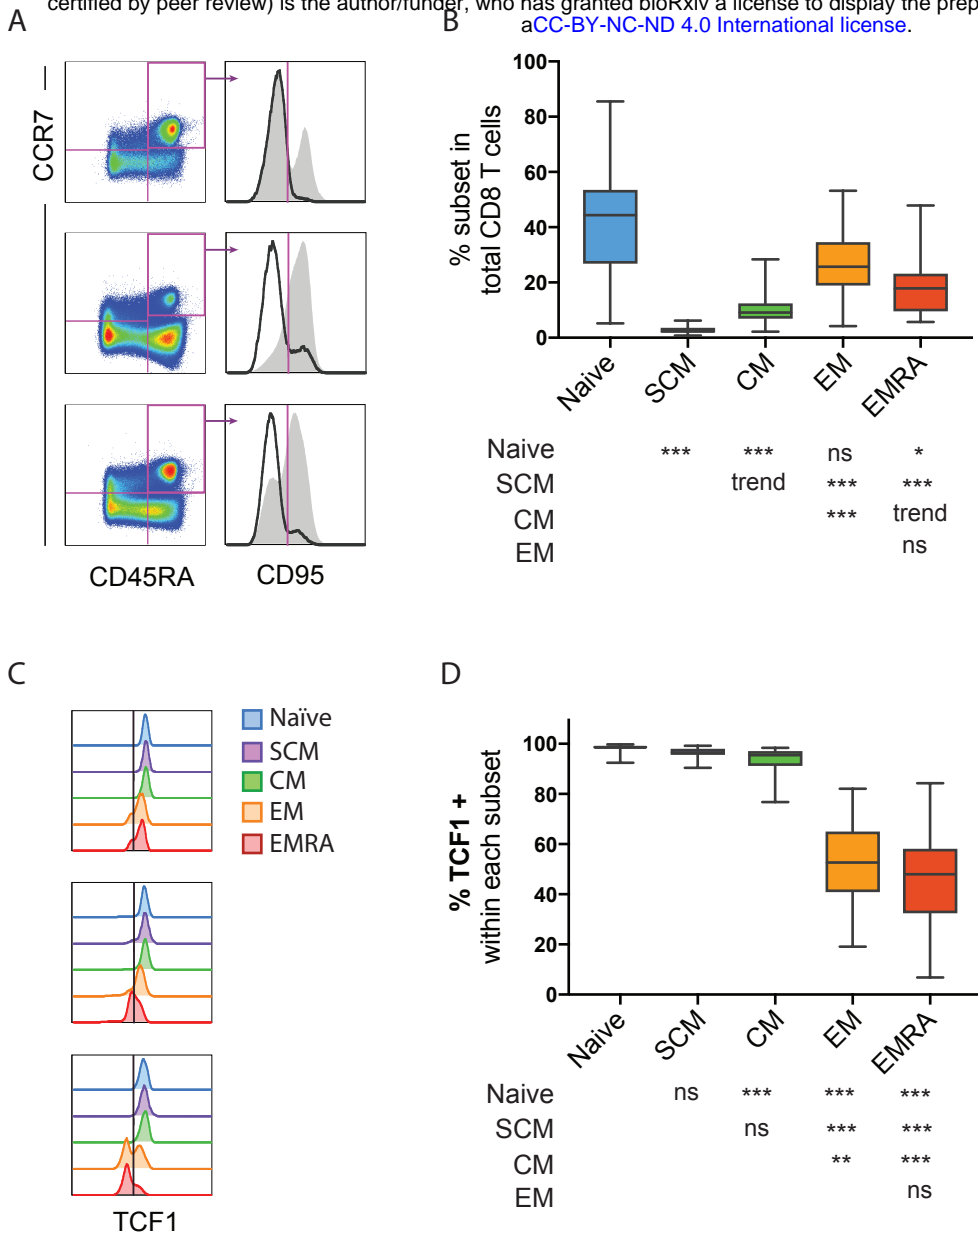

Figure 4

bioRxiv preprint doi: <https://doi.org/10.1101/808774>; this version posted October 17, 2019. The copyright holder for this preprint (which was not certified by peer review) is the author/funder, who has granted bioRxiv a license to display the preprint in perpetuity. It is made available under aCC-BY-NC-ND 4.0 International license.

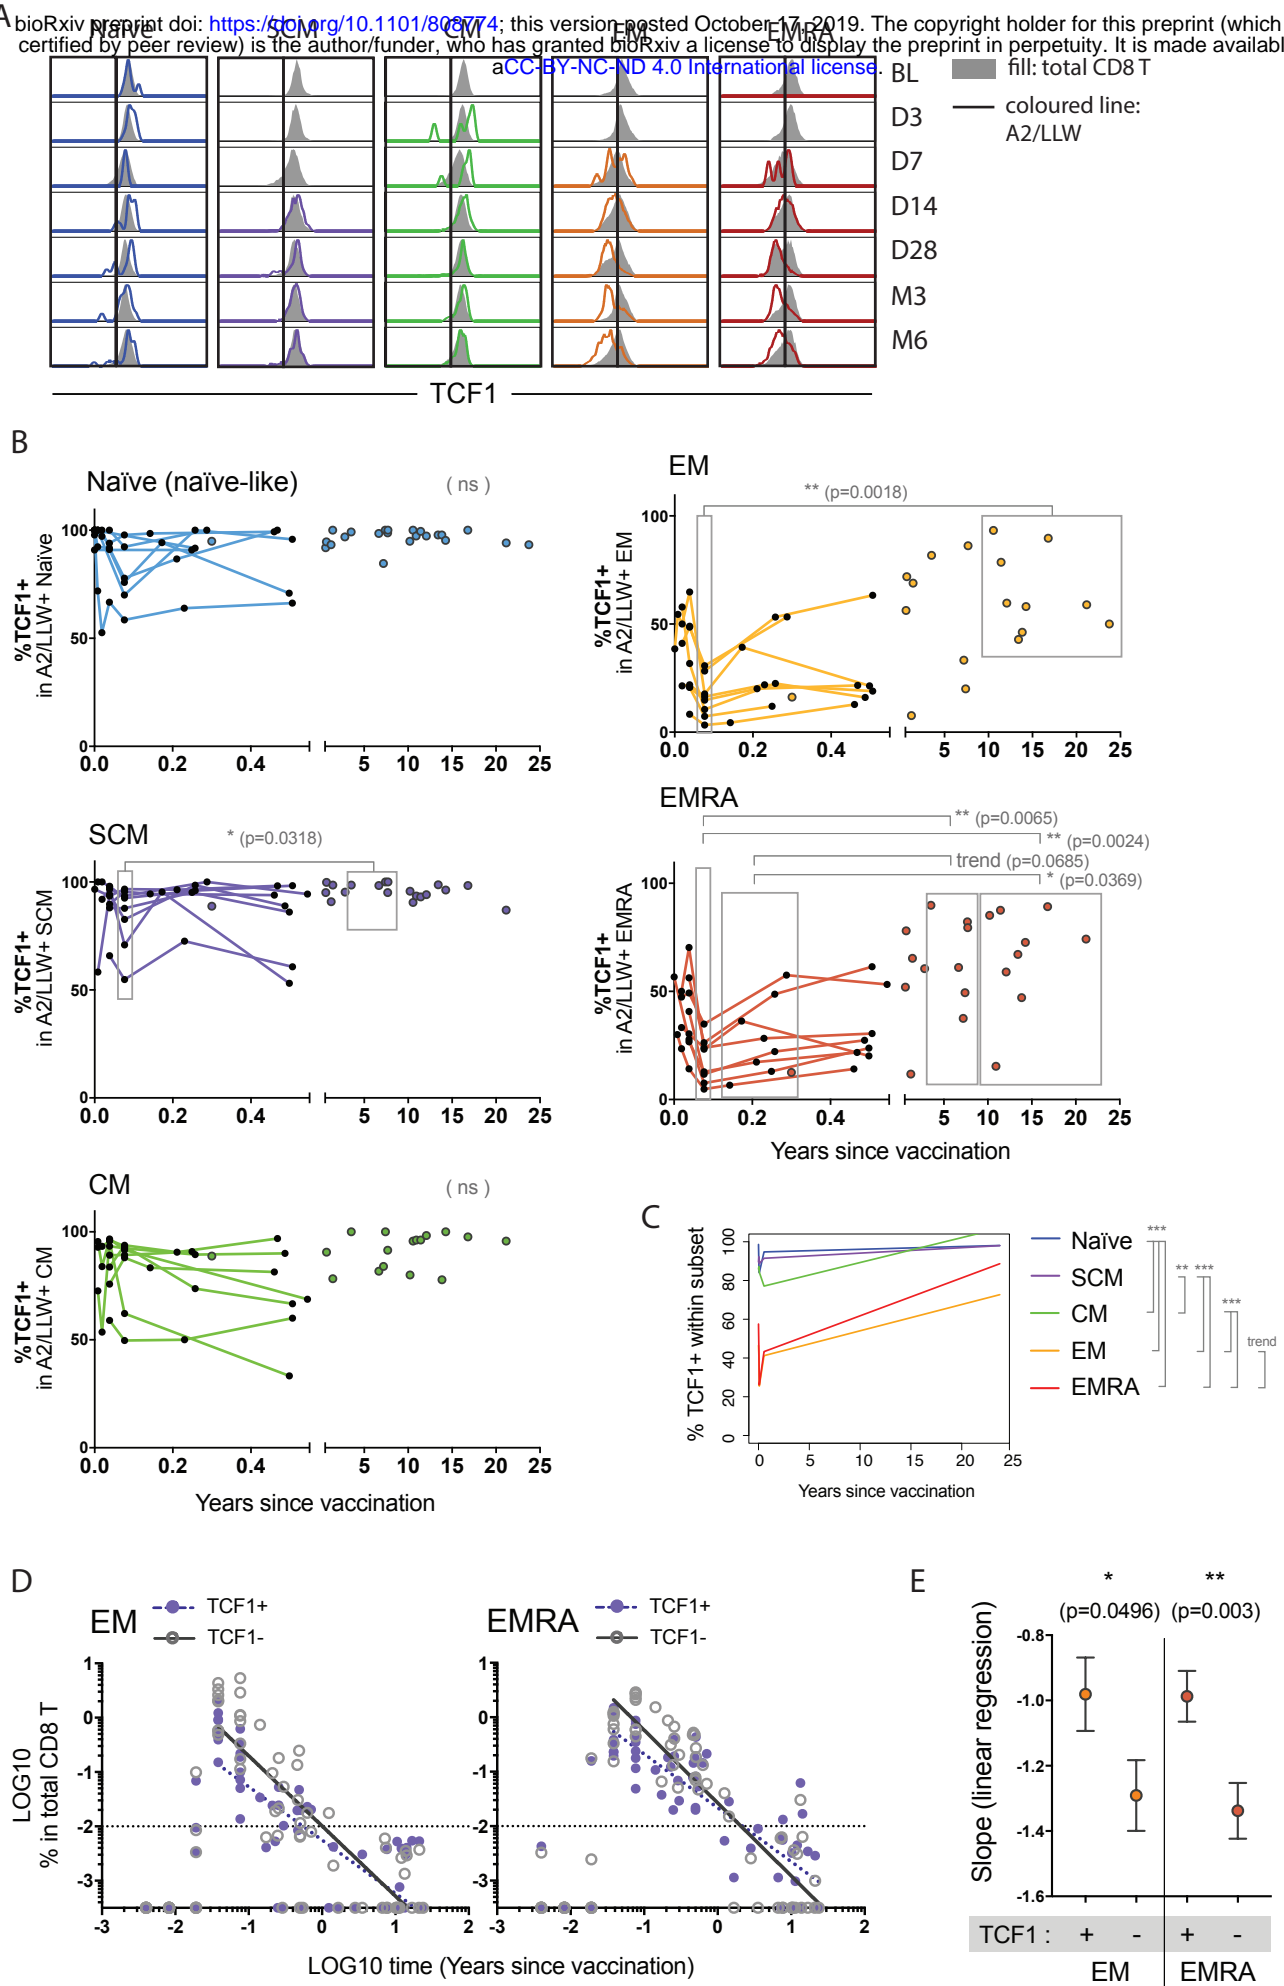

Figure 5

bioRxiv preprint doi: <https://doi.org/10.1101/808774>; this version posted October 17, 2019. The copyright holder for this preprint (which was not certified by peer review) is the author/funder, who has granted bioRxiv a license to display the preprint in perpetuity. It is made available under aCC-BY-NC-ND 4.0 International license.

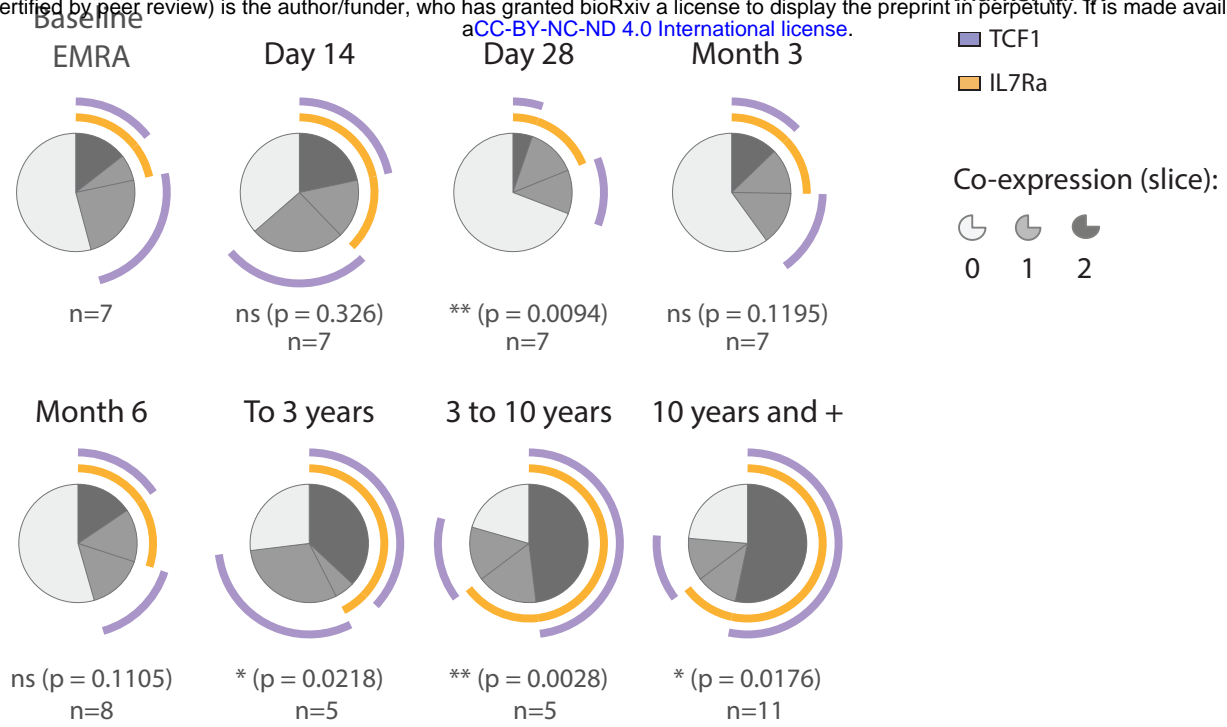

Figure 6

bioRxiv preprint doi: <https://doi.org/10.1101/808774>; this version posted October 17, 2019. The copyright holder for this preprint (which was not certified by peer review) is the author/funder, who has granted bioRxiv a license to display the preprint in perpetuity. It is made available under aCC-BY-NC-ND 4.0 International license.

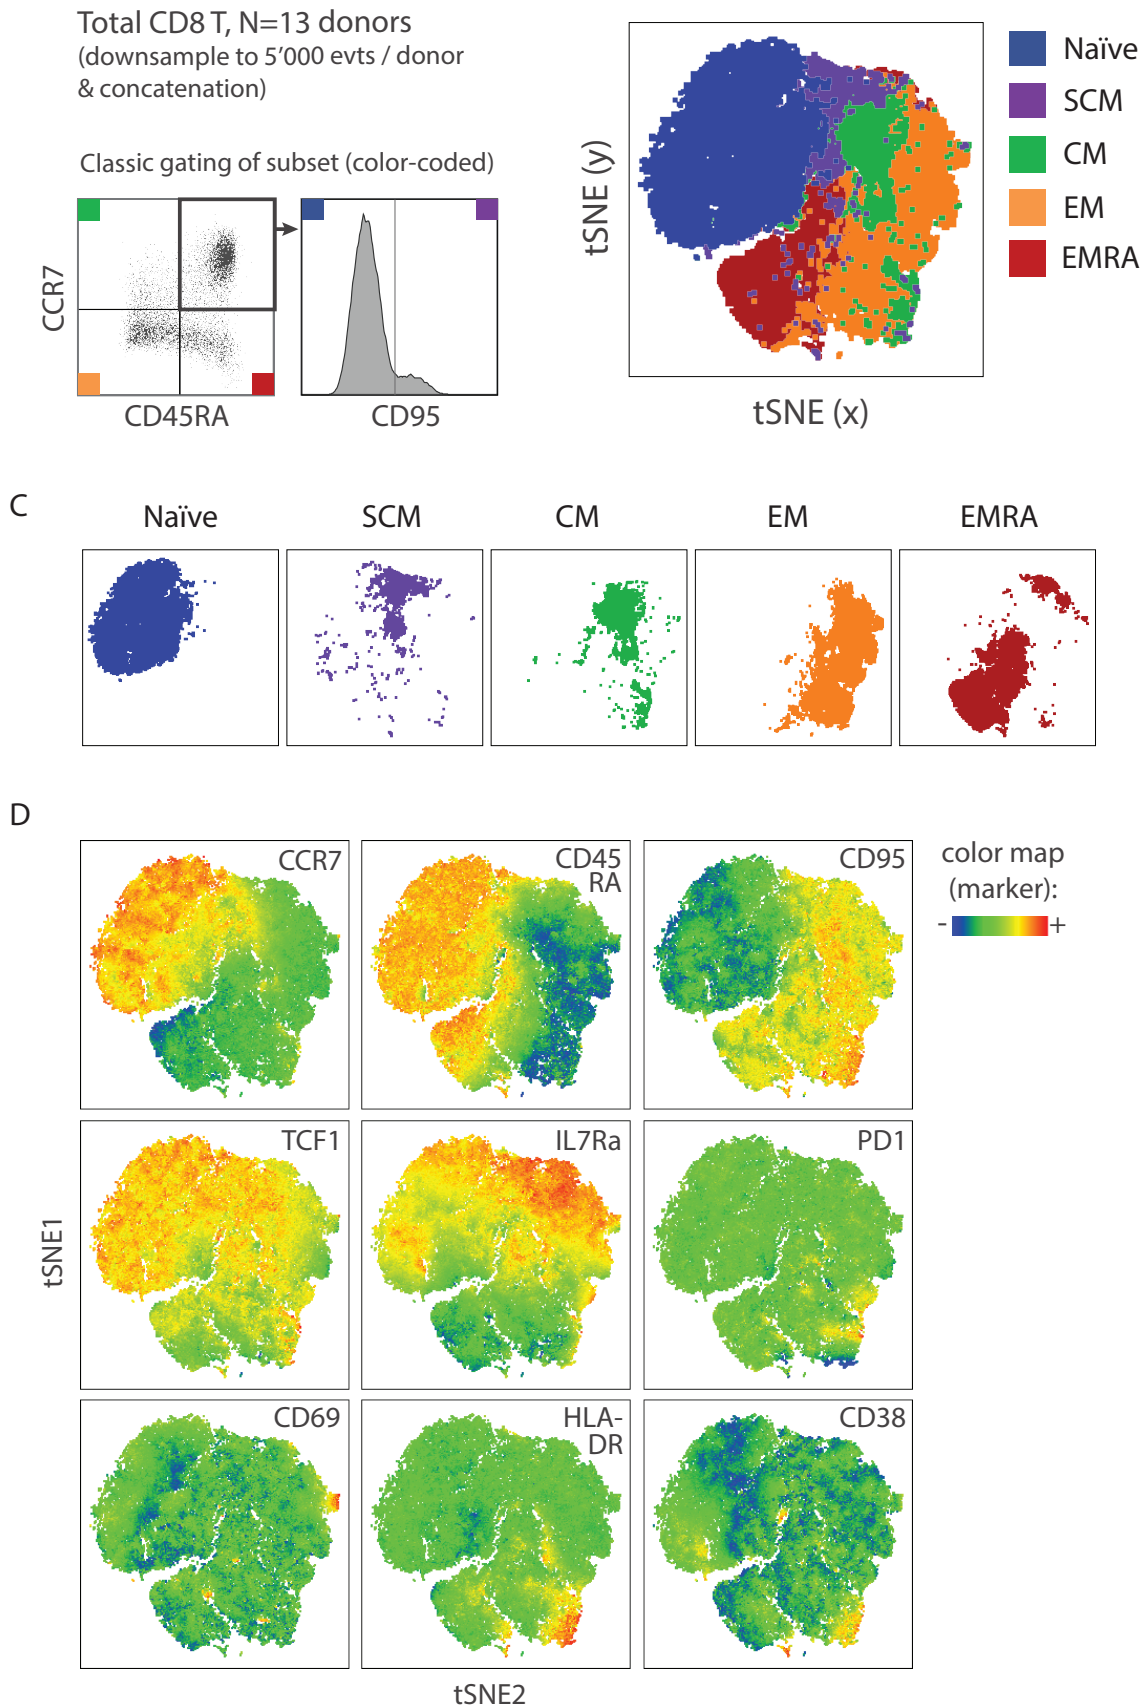

**D**

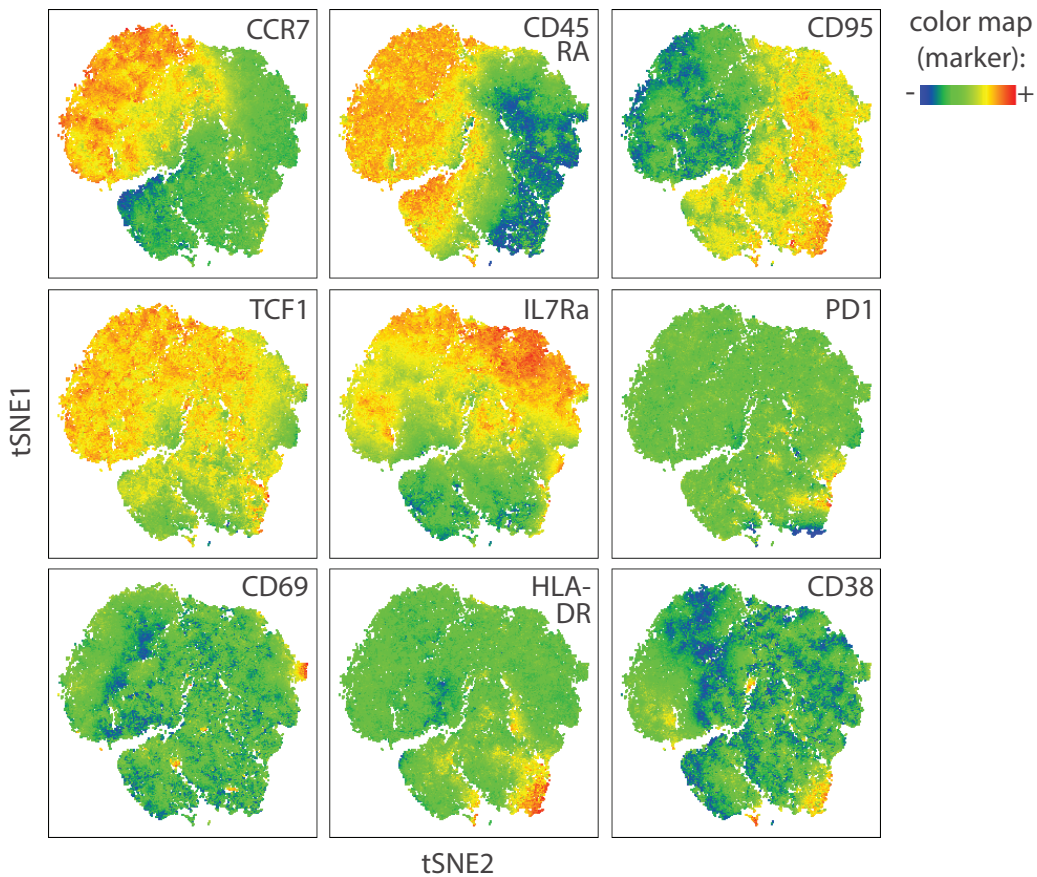

Figure 7 + videos 1 and 2 (time-lapse animation) links

A bioRxiv preprint doi: <https://doi.org/10.1101/808774>; this version posted October 17, 2019. The copyright holder for this preprint (which was not certified by peer review) is the author/funder, who has granted bioRxiv a license to display the preprint in perpetuity. It is made available under aCC-BY-NC-ND 4.0 International license.

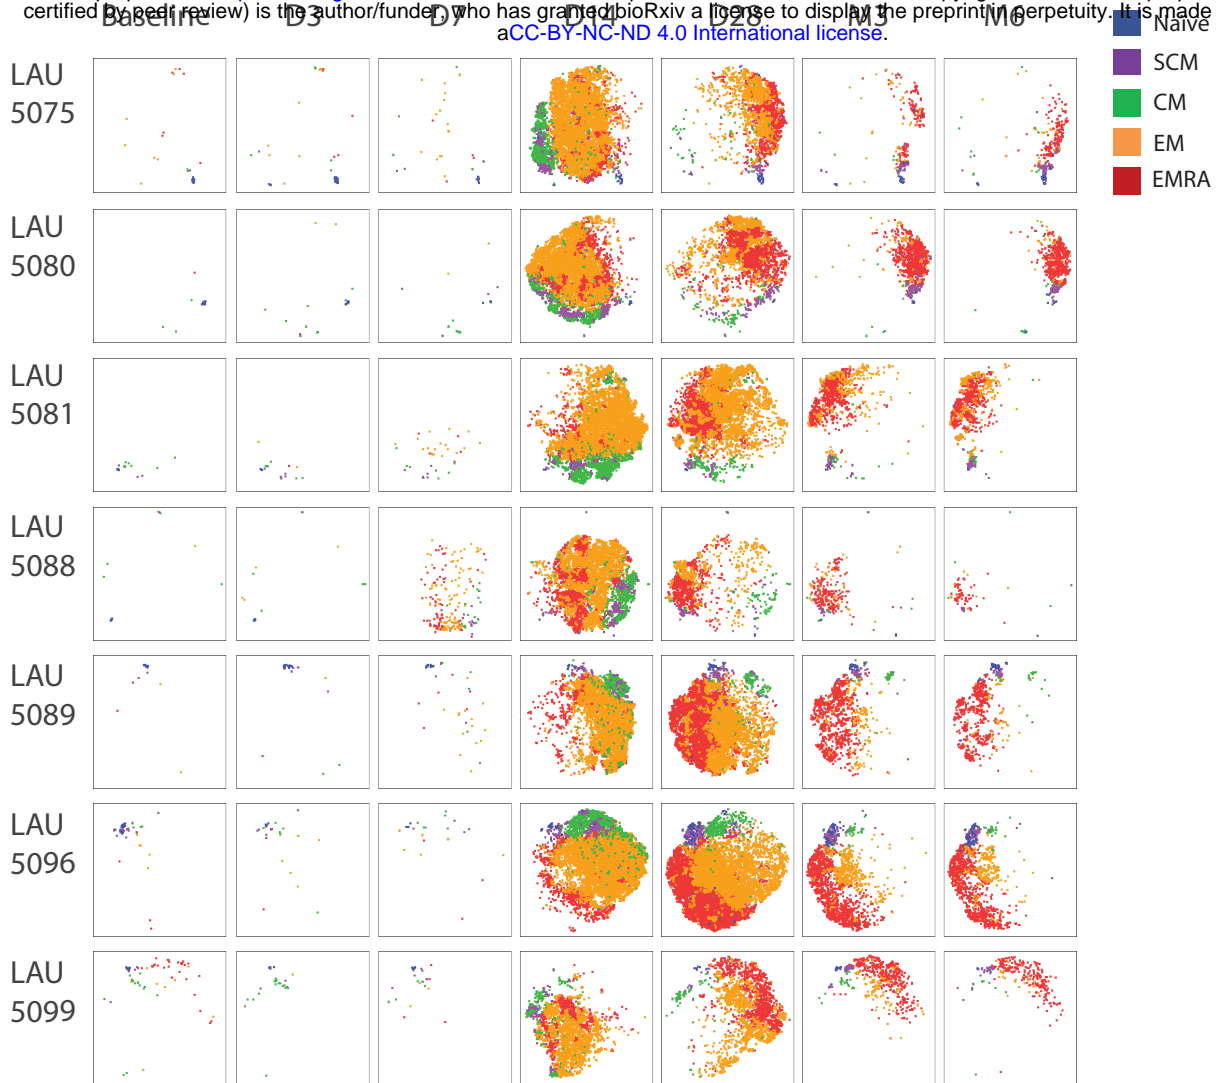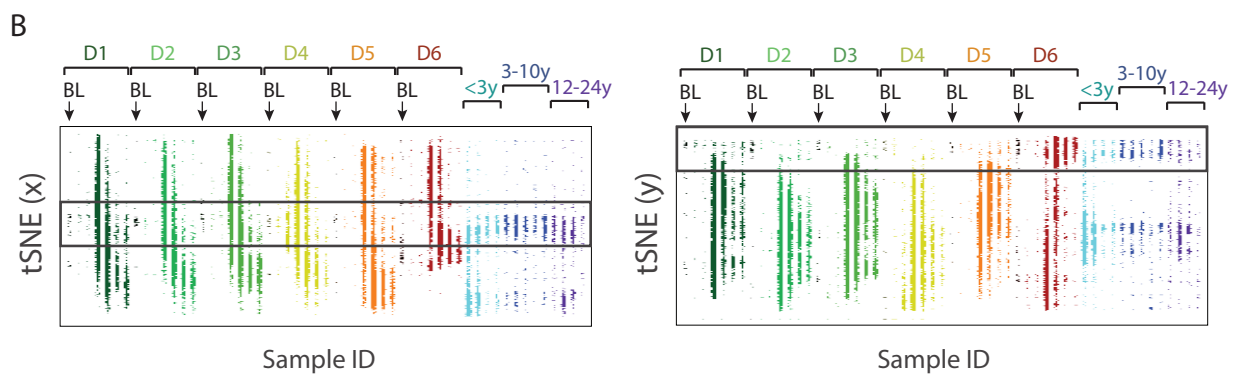

Source: http://biorxiv.org/content/10.1101/808774v1.full.pdf
